# Supplementary material for: Water-insoluble organic carbon in PM 2.5 over China: light-absorbing properties, potential sources, radiative forcing effects and possible light-absorbing continuum
Source: Copernicus journal article supplement (doi:10.5194/egusphere-2024-130), 2024-02-19
Supplement: Supplementary file 1 [file egusphere-2024-130-supplement.pdf]

# ***Supporting Information for***

## **Water-insoluble organic carbon in PM<sub>2.5</sub> over China: light-absorbing properties, potential sources, radiative forcing effects and possible light-absorbing continuum**

Yangzhi Mo<sup>1,2</sup>, Jun Li<sup>\*1,2</sup>, Guangcai Zhong<sup>1,2</sup>, Sanyuan Zhu<sup>1,2</sup>, Shizhen Zhao<sup>1,2</sup>, Jiao Tang<sup>1,2</sup>, Hongxing Jiang<sup>3</sup>, Zhineng Cheng<sup>1,2</sup>, Chongguo Tian<sup>4</sup>, Yingjun Chen<sup>3</sup>, Gan Zhang<sup>1,2</sup>

<sup>1</sup> State Key Laboratory of Organic Geochemistry and Guangdong province Key Laboratory of Environmental Protection and Guangdong-Hong Kong-Macao Joint Laboratory for Environmental Pollution and Control, Guangzhou Institute of Geochemistry, Chinese Academy of Science, Guangzhou 510640, China

<sup>2</sup> CAS Center for Excellence in Deep Earth Science, Guangzhou, 510640, China

<sup>3</sup> Shanghai Key Laboratory of Atmospheric Particle Pollution and Prevention (LAP3), Department of Environmental Science and Engineering, Fudan University, Shanghai 200438, China

<sup>4</sup> Key Laboratory of Coastal Environmental Processes and Ecological Remediation, Yantai Institute of Coastal Zone Research, Chinese Academy of Sciences, Yantai, 264003, China

\*Corresponding Authors: Dr. Jun Li

E-mail: [junli@gig.ac.cn](mailto:junli@gig.ac.cn); Tel: +86-20-85291508; Fax: +86-20-85290706

**Content: 7 pages, 1 text, 2 tables, and 3 figures**

23  
24  
25  
26  
27  
28  
29  
30  
31  
32  
33  
34  
35  
36  
37  
38  
39

**Text S1. Calculation of MAC for particulate light-absorbing OC**

MAC can be compared with MAE only after considering the particulate effect ( $\xi$ ) and in the small-particle limit (diameter  $\ll \lambda$ ) (Sun et al., 2007):

$$\text{MAC}(\lambda) = \text{MAE}(\lambda) \times \xi(\lambda) \quad (\text{S1})$$

$$\xi(\lambda) = \frac{9n}{(n^2 - k(\lambda)^2 + 2) + 4n^2k(\lambda)^2} \quad (\text{S2})$$

where  $n$  and  $k$  represent the real and imaginary parts of the complex refractive index ( $m = n + ik$ ), respectively. In this study, we assume a constant  $n$  value of 1.55 (Lu et al., 2015), and the wavelength-dependent  $k$  is calculated as:

$$k(\lambda) = \frac{\rho \times \lambda \times \text{MAE}(\lambda)}{4\pi \times \left(\frac{\text{OA}}{\text{OC}}\right)} \quad (\text{S3})$$

where  $\rho$  is the density of particle and was fixed to 1.2 g/cm<sup>3</sup>. The OA/OC ratios are 1.51, 1.91, 2.30 for WIOC, HULIS and non-HULIS, respectively (Kiss et al., 2002).

40  
41  
42  
43

**Table S1.** Summary of concentration and light absorption of extractible organic carbon components in PM<sub>2.5</sub> from ten Chinese cities

| Component                                                   | Unit               | Warm seasons<br>rang (avg <sup>a</sup> ± std <sup>b</sup> ) | Cold seasons<br>rang (avg ± std) | Annual<br>avg ± std |
|-------------------------------------------------------------|--------------------|-------------------------------------------------------------|----------------------------------|---------------------|
| WIOC                                                        |                    | 1.45–5.25 (2.29 ± 0.95)                                     | 1.93–12.9 (4.87 ± 2.89)          | 3.65 ± 2.53         |
| HULIS-C                                                     | μgC/m <sup>3</sup> | 1.37–4.31 (2.46 ± 0.77)                                     | 2.10–7.64 (4.63 ± 1.49)          | 3.60 ± 1.62         |
| Non-HULIS-C <sup>c</sup>                                    |                    | 1.28–5.61 (2.36 ± 1.16)                                     | 1.55–7.96 (4.09 ± 1.51)          | 3.27 ± 1.60         |
| EX-OC <sup>d</sup>                                          |                    | 4.19–12.8 (7.11 ± 2.38)                                     | 6.25–25.2 (13.6 ± 5.22)          | 10.5 ± 5.23         |
| Abs <sub>365, WIOC</sub>                                    | Mm <sup>-1</sup>   | 1.27–7.69 (2.76 ± 1.77)                                     | 2.78–38.5 (10.4 ± 8.69)          | 6.80 ± 7.44         |
| Abs <sub>365, HULIS</sub>                                   |                    | 1.04–6.05 (2.96 ± 1.4)                                      | 2.27–17.2 (8.72 ± 3.75)          | 5.99 ± 4.08         |
| Abs <sub>365, non-HULIS</sub>                               |                    | 0.53–2.72 (1.25 ± 0.68)                                     | 1.11–8.50 (3.76 ± 2.27)          | 2.57 ± 2.11         |
| Abs <sub>365, EX-OC</sub>                                   |                    | 3.24–16.1 (6.98 ± 3.54)                                     | 6.42–55.4 (22.9 ± 13.0)          | 15.4 ± 12.6         |
| WIOC/EX-OC                                                  |                    | 15.4–48.7 (32.5 ± 6.97)                                     | 19.8–57.5 (34.2 ± 8.12)          | 33.4 ± 7.55         |
| HULIS-C/EX-OC                                               |                    | 25.2–45.4 (35.1 ± 5.29)                                     | 19.2–47.6 (35.3 ± 6.32)          | 35.2 ± 5.77         |
| Non-HULIS-C/EX-OC                                           | %                  | 21.1–43.8 (32.4 ± 5.92)                                     | 23.4–36.6 (30.5 ± 4.34)          | 31.4 ± 5.17         |
| Abs <sub>365, WIOC</sub> /Abs <sub>365, EX-OC</sub>         |                    | 20.3–50.6 (38.4 ± 9.06)                                     | 29.4–69.6 (42.5 ± 10.1)          | 40.5 ± 9.73         |
| Abs <sub>365, HULIS-C</sub> /Abs <sub>365, EX-OC</sub>      |                    | 32.2–55.1 (42.8 ± 6.54)                                     | 22.5–57.9 (40.5 ± 7.90)          | 41.6 ± 7.28         |
| Abs <sub>365, non-HULIS-C</sub> / Abs <sub>365, EX-OC</sub> |                    | 9.51–26.8 (18 ± 4.43)                                       | 6.80–30.4 (17.0 ± 5.58)          | 17.5 ± 5.02         |

44  
45  
46  
47  
48  
49  
50  
51

<sup>a</sup> avg: average

<sup>b</sup> std: standard deviation

<sup>c</sup> The concentration of non-HULIS-C is calculated by the difference between WSOC and HULIS-C

<sup>d</sup> The concentration of extractable organic carbon (EX-OC) is the sum of WSOC and WIOC.

52

53

54

55 **Table S2.** The person correlation coefficients ( $r$ ) of concentrations and Abs<sub>365</sub> of WIOC with water soluble  
 56 ions in cold and warm seasons.

57

|                               | Concentrations of WIOC |              | Abs <sub>365</sub> of WIOC |              |
|-------------------------------|------------------------|--------------|----------------------------|--------------|
|                               | Warm seasons           | Cold seasons | Warm seasons               | Cold seasons |
| K <sup>+</sup>                | 0.04                   | 0.61**       | 0.25                       | 0.48*        |
| Cl <sup>-</sup>               | 0.46                   | 0.92**       | 0.63**                     | 0.90**       |
| NO <sub>3</sub> <sup>-</sup>  | 0.38                   | 0.29         | 0.53*                      | 0.18         |
| SO <sub>4</sub> <sup>2-</sup> | 0.44                   | 0.69**       | 0.51*                      | 0.63**       |
| NH <sub>4</sub> <sup>+</sup>  | 0.51*                  | 0.51*        | 0.59*                      | 0.49*        |

58

59 \* Significance at  $p < 0.05$  level60 \*\* Significance at  $p < 0.01$  level

61

62

63

64

65

66

67

68

69

70

71

72

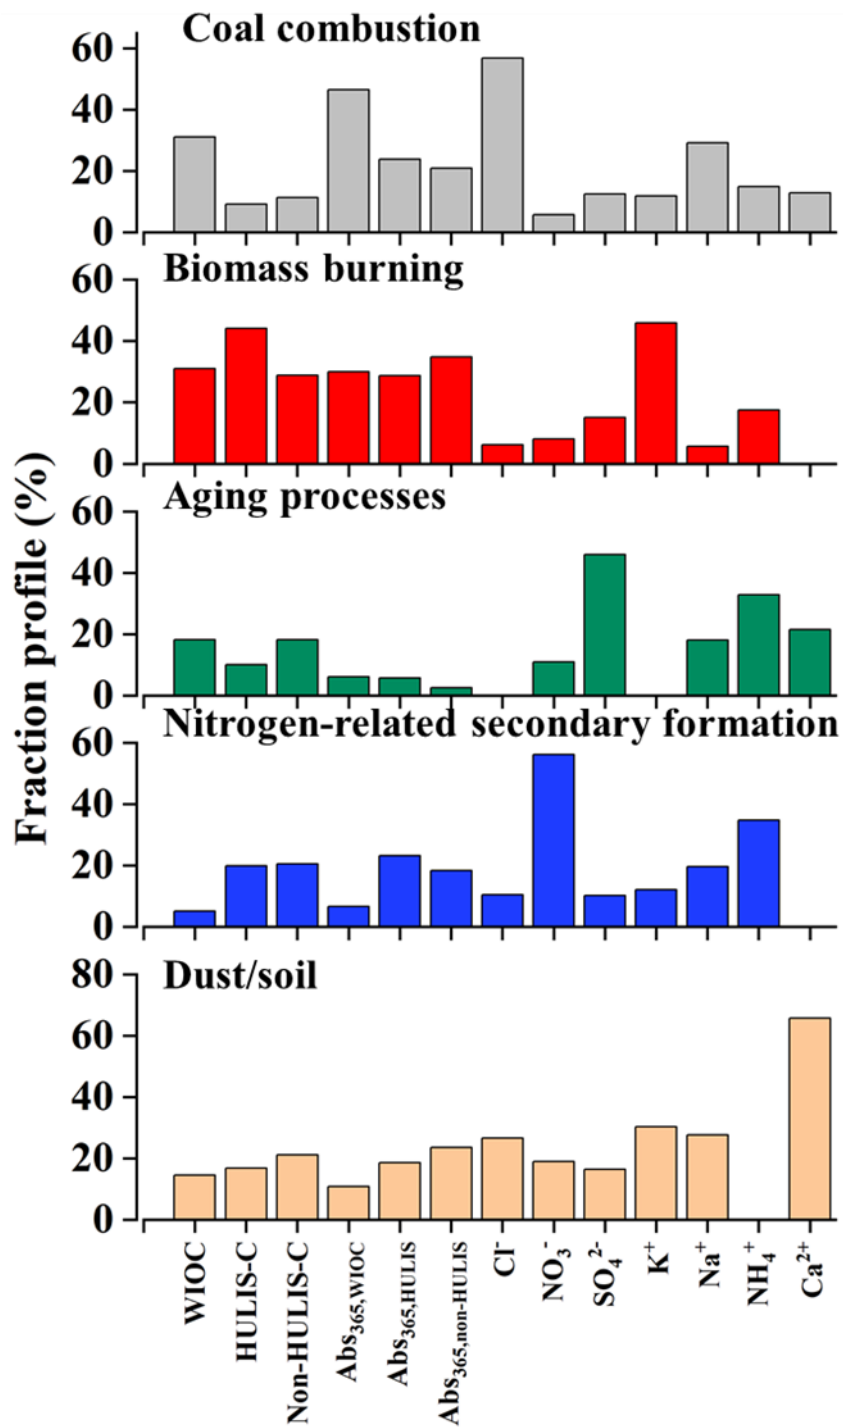

**Figure S1.** Source profiles for five sources resolved by the positive matrix factorization (PMF) model.

73  
74  
75  
76

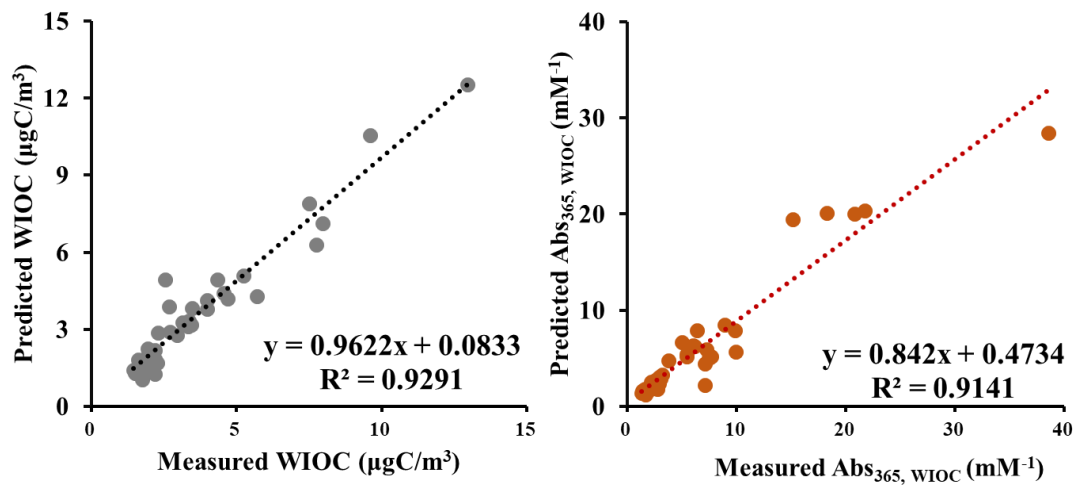

**Figure S2.** PMF-predicted versus measured values of (a) concentrations and (b) Abs<sub>365</sub> of WIOC.

77  
78  
79  
80  
81  
82  
83  
84  
85  
86  
87  
88  
89  
90  
91  
92  
93  
94  
95  
96  
97  
98  
99  
100  
101  
102  
103  
104  
105  
106  
107  
108  
109  
110  
111

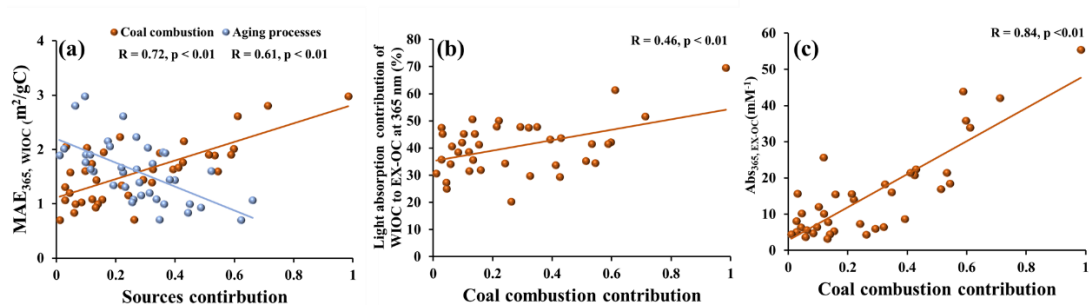

112  
 113 **Figure S3.** (a) The correlation of mass absorption efficient (MAE<sub>365</sub>) of WIOC to relative contribution of  
 114 coal combustion (brown dots) and aging processes (blue dots). (b) The relationship between relative  
 115 contribution of coal combustion and light absorption contribution of WIOC to EX-OC at 365 nm. (c) The  
 116 relationship between relative contribution of coal combustion and light absorption of EX-CO at 365 nm.  
 117

118  
 119  
 120  
 121 **References:**

122 Kiss, G., Varga, B., Galambos, I., Ganszky, I. (2002), Characterization of water-soluble organic matter  
 123 isolated from atmospheric fine aerosol, *Journal of Geophysical Research-Atmospheres*,  
 124 *107*(D21).<https://doi.org/10.1029/2001jd000603>  
 125 Lu, Z.F., Streets, D.G., Winijkul, E., Yan, F., Chen, Y.J., Bond, T.C., Feng, Y., Dubey, M.K., Liu, S., Pinto,  
 126 J.P., Carmichael, G.R. (2015), Light Absorption Properties and Radiative Effects of Primary Organic  
 127 Aerosol Emissions, *Environmental Science & Technology*, *49*(8), 4868-  
 128 4877.<https://doi.org/10.1021/acs.est.5b00211>  
 129 Sun, H.L., Biedermann, L., Bond, T.C. (2007), Color of brown carbon: A model for ultraviolet and visible  
 130 light absorption by organic carbon aerosol, *Geophysical Research Letters*,  
 131 *34*(17).<https://doi.org/10.1029/2007gl029797>  
 132  
 133  
 134
