# Supplementary material for: Water-insoluble organic carbon in PM 2.5 over China: light-absorbing properties, potential sources, radiative forcing effects and possible light-absorbing continuum
Source: Copernicus journal article supplement (doi:10.5194/egusphere-2024-130), 2024-02-19
Supplement: Supplementary file [file egusphere-2024-130-AC4-supplement.zip]

# ***Supporting Information for***

## **The water-insoluble organic carbon in PM<sub>2.5</sub> of typical Chinese urban areas: light-absorbing properties, potential sources, radiative forcing effects and possible light-absorbing continuum**

Yangzhi Mo<sup>1,2</sup>, Jun Li<sup>1,2</sup>, Guangcai Zhong<sup>1,2</sup>, Sanyuan Zhu<sup>1,2</sup>, Shizhen Zhao<sup>1,2</sup>, Jiao Tang<sup>1,2</sup>, Hongxing Jiang<sup>3</sup>, Zhineng Cheng<sup>1,2</sup>, Chongguo Tian<sup>4</sup>, Yingjun Chen<sup>3</sup>, Gan Zhang<sup>\*,1,2</sup>

<sup>1</sup> State Key Laboratory of Organic Geochemistry and Guangdong province Key Laboratory of Environmental Protection and Guangdong-Hong Kong-Macao Joint Laboratory for Environmental Pollution and Control, Guangzhou Institute of Geochemistry, Chinese Academy of Science, Guangzhou 510640, China

<sup>2</sup> CAS Center for Excellence in Deep Earth Science, Guangzhou, 510640, China

<sup>3</sup> Shanghai Key Laboratory of Atmospheric Particle Pollution and Prevention (LAP3), Department of Environmental Science and Engineering, Fudan University, Shanghai 200438, China

<sup>4</sup> Key Laboratory of Coastal Environmental Processes and Ecological Remediation, Yantai Institute of Coastal Zone Research, Chinese Academy of Sciences, Yantai, 264003, China

\*Corresponding author: Dr. Gan Zhang

E-mail: [zhanggan@gig.ac.cn](mailto:zhanggan@gig.ac.cn); Tel: +86-20-85290805; Fax: +86-20-85290706;

**Content: 7 pages, 2 text, 2 tables, and 3 figures**

**Text S1. Water soluble inorganic ions measurements**

3 anions ( $\text{Cl}^-$ ,  $\text{NO}_3^-$  and  $\text{SO}_4^{2-}$ ) and 4 cations ( $\text{Na}^+$ ,  $\text{K}^+$ ,  $\text{Ca}^{2+}$  and  $\text{NH}_4^+$ ) were analyzed with ion-chromatography (761 Compact IC, Metrohm, Switzerland). Anions were separated on a Metrohm Metrosep A sup5-250 column with 3.2 mM  $\text{Na}_2\text{CO}_3$  and 1.0 mM  $\text{NaHCO}_3$  as the eluent and 35 mM  $\text{H}_2\text{SO}_4$  for a suppressor. Cations were measured using a Metrohm Metrosep C4-150 column with 2 mM sulfuric acid as the eluent. The injection loop volume for anion and cation was 100  $\mu\text{L}$ . The water-soluble ions analyses were duplicated for several filter samples, and the overall relative standard deviations were generally less than 4%.

**Text S2. Calculation of MAC for particulate light-absorbing OC**

MAC can be compared with MAE only after considering the particulate effect ( $\xi$ ) and in the small-particle limit (diameter  $\ll \lambda$ ) (Sun et al., 2007):

$$\text{MAC}(\lambda) = \text{MAE}(\lambda) \times \xi(\lambda) \quad (\text{S1})$$

$$\xi(\lambda) = \frac{9n}{(n^2 - k(\lambda)^2 + 2) + 4n^2k(\lambda)^2} \quad (\text{S2})$$

where  $n$  and  $k$  represent the real and imaginary parts of the complex refractive index ( $m = n + ik$ ), respectively. In this study, we assume a constant  $n$  value of 1.55 (Lu et al., 2015), and the wavelength-dependent  $k$  is calculated as:

$$k(\lambda) = \frac{\rho \times \lambda \times \text{MAE}(\lambda)}{4\pi \times \left(\frac{\text{OA}}{\text{OC}}\right)} \quad (\text{S3})$$

where  $\rho$  is the density of particle and was fixed to 1.2  $\text{g}/\text{cm}^3$ . The OA/OC ratios are 1.51, 1.91, 2.30 for WIOC, HULIS and non-HULIS, respectively (Kiss et al., 2002).

49

50 **Table S1.** Summary of concentration and light absorption of extractble organic carbon components in PM<sub>2.5</sub>  
 51 from ten Chinese cities

52

| Component                                                     | Unit               | Warm seasons<br>rang (avg <sup>a</sup> ± std <sup>b</sup> ) | Cold seasons<br>rang (avg ± std) | Annual<br>avg ± std |
|---------------------------------------------------------------|--------------------|-------------------------------------------------------------|----------------------------------|---------------------|
| WIOC                                                          | μgC/m <sup>3</sup> | 1.45–5.25 (2.29 ± 0.95)                                     | 1.93–12.9 (4.87 ± 2.89)          | 3.65 ± 2.53         |
| HULIS-C                                                       |                    | 1.37–4.31 (2.46 ± 0.77)                                     | 2.10–7.64 (4.63 ± 1.49)          | 3.60 ± 1.62         |
| Non-HULIS-C <sup>c</sup>                                      |                    | 1.28–5.61 (2.36 ± 1.16)                                     | 1.55–7.96 (4.09 ± 1.51)          | 3.27 ± 1.60         |
| EX-OC <sup>d</sup>                                            |                    | 4.19–12.8 (7.11 ± 2.38)                                     | 6.25–25.2 (13.6 ± 5.22)          | 10.5 ± 5.23         |
| Abs <sub>365</sub> , WIOC                                     | Mm <sup>-1</sup>   | 1.27–7.69 (2.76 ± 1.77)                                     | 2.78–38.5 (10.4 ± 8.69)          | 6.80 ± 7.44         |
| Abs <sub>365</sub> , HULIS                                    |                    | 1.04–6.05 (2.96 ± 1.4)                                      | 2.27–17.2 (8.72 ± 3.75)          | 5.99 ± 4.08         |
| Abs <sub>365</sub> , non-HULIS                                |                    | 0.53–2.72 (1.25 ± 0.68)                                     | 1.11–8.50 (3.76 ± 2.27)          | 2.57 ± 2.11         |
| Abs <sub>365</sub> , EX-OC                                    |                    | 3.24–16.1 (6.98 ± 3.54)                                     | 6.42–55.4 (22.9 ± 13.0)          | 15.4 ± 12.6         |
| WIOC/EX-OC                                                    | %                  | 15.4–48.7 (32.5 ± 6.97)                                     | 19.8–57.5 (34.2 ± 8.12)          | 33.4 ± 7.55         |
| HULIS-C/EX-OC                                                 |                    | 25.2–45.4 (35.1 ± 5.29)                                     | 19.2–47.6 (35.3 ± 6.32)          | 35.2 ± 5.77         |
| Non-HULIS-C/EX-OC                                             |                    | 21.1–43.8 (32.4 ± 5.92)                                     | 23.4–36.6 (30.5 ± 4.34)          | 31.4 ± 5.17         |
| Abs <sub>365</sub> , WIOC/Abs <sub>365</sub> , EX-OC          |                    | 20.3–50.6 (38.4 ± 9.06)                                     | 29.4–69.6 (42.5 ± 10.1)          | 40.5 ± 9.73         |
| Abs <sub>365</sub> , HULIS-C/Abs <sub>365</sub> , EX-OC       |                    | 32.2–55.1 (42.8 ± 6.54)                                     | 22.5–57.9 (40.5 ± 7.90)          | 41.6 ± 7.28         |
| Abs <sub>365</sub> , non-HULIS-C / Abs <sub>365</sub> , EX-OC |                    | 9.51–26.8 (18 ± 4.43)                                       | 6.80–30.4 (17.0 ± 5.58)          | 17.5 ± 5.02         |

53

54 <sup>a</sup> avg: average55 <sup>b</sup> std: standard deviation56 <sup>c</sup> The concentration of non-HULIS-C is calculated by the difference between WSOC and HULIS-C57 <sup>d</sup> The concentration of extractable organic carbon (EX-OC) is the sum of WSOC and WIOC.

58

59

60

|                               | Concentrations of WIOC |                    | Abs <sub>365</sub> of WIOC |                    |
|-------------------------------|------------------------|--------------------|----------------------------|--------------------|
|                               | Warm seasons           | Cold seasons       | Warm seasons               | Cold seasons       |
| K <sup>+</sup>                | 0.04                   | 0.61 <sup>**</sup> | 0.25                       | 0.48 <sup>*</sup>  |
| Cl <sup>-</sup>               | 0.46                   | 0.92 <sup>**</sup> | 0.63 <sup>**</sup>         | 0.90 <sup>**</sup> |
| NO <sub>3</sub> <sup>-</sup>  | 0.38                   | 0.29               | 0.53 <sup>*</sup>          | 0.18               |
| SO <sub>4</sub> <sup>2-</sup> | 0.44                   | 0.69 <sup>**</sup> | 0.51 <sup>*</sup>          | 0.63 <sup>**</sup> |
| NH <sub>4</sub> <sup>+</sup>  | 0.51 <sup>*</sup>      | 0.51 <sup>*</sup>  | 0.59 <sup>*</sup>          | 0.49 <sup>*</sup>  |

\* Significance at  $p < 0.05$  level

\*\* Significance at  $p < 0.01$  level

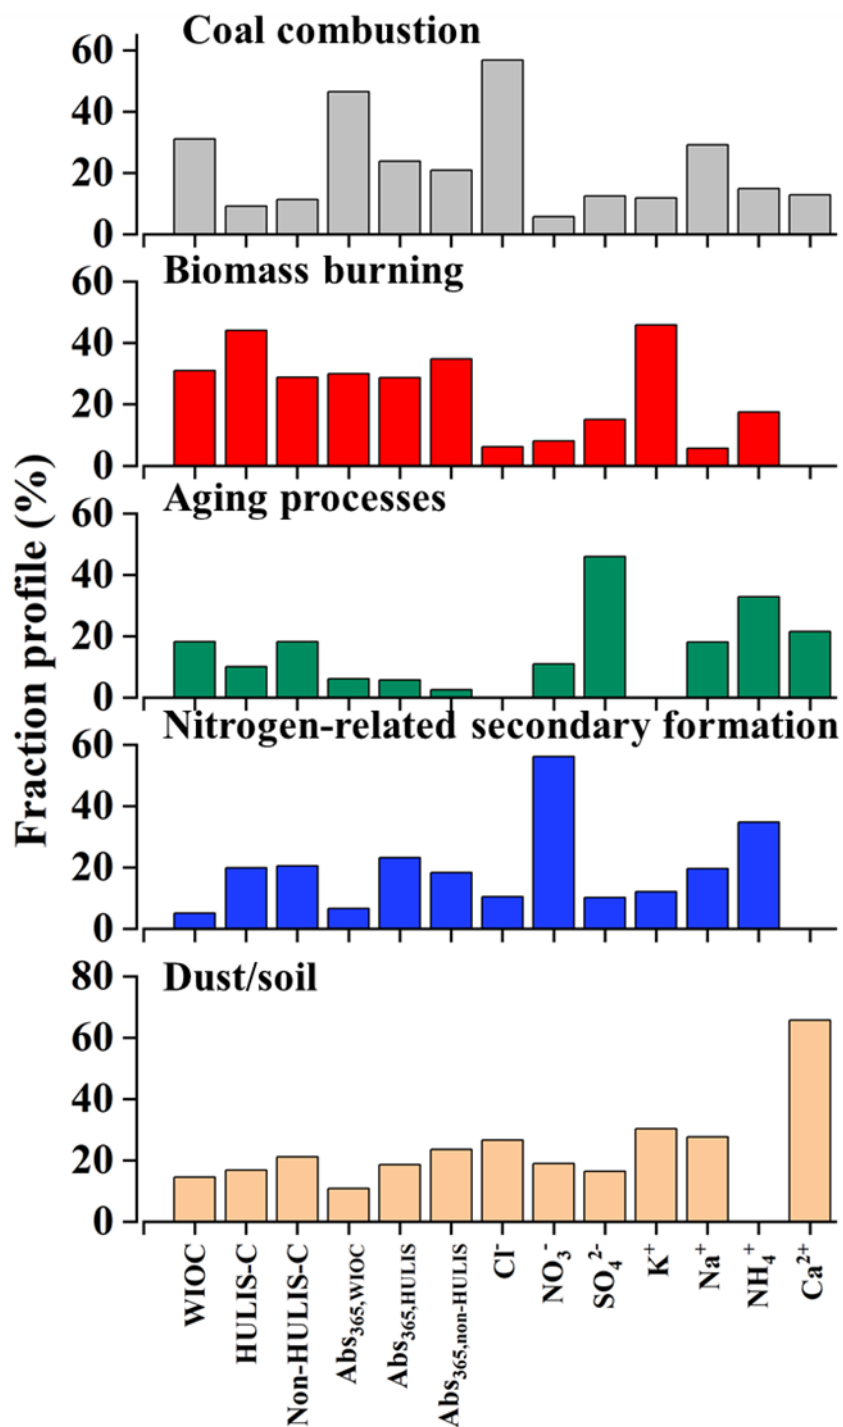

**Figure S1.** Source profiles for five sources resolved by the positive matrix factorization (PMF) model.

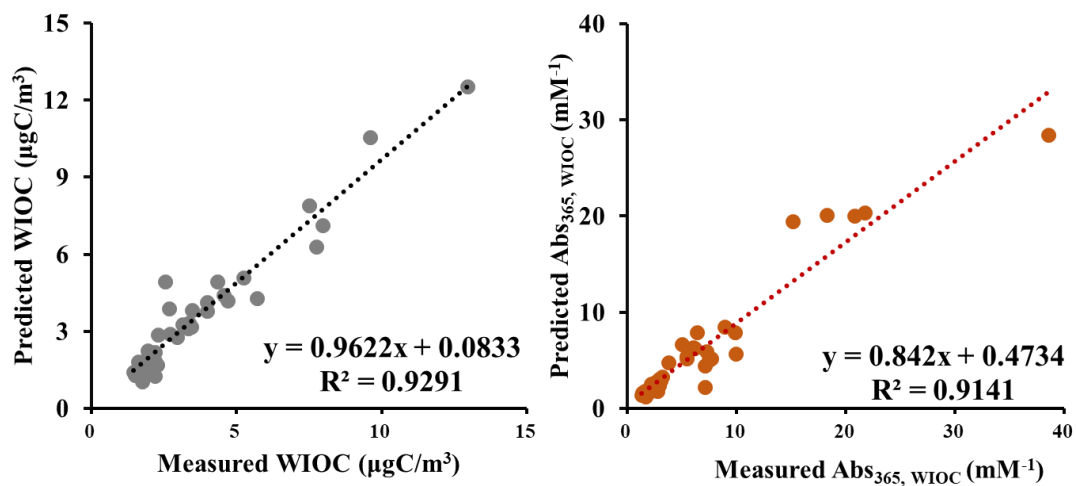

**Figure S2.** PMF-predicted versus measured values of (a) concentrations and (b)  $\text{Abs}_{365}$  of WIOC.

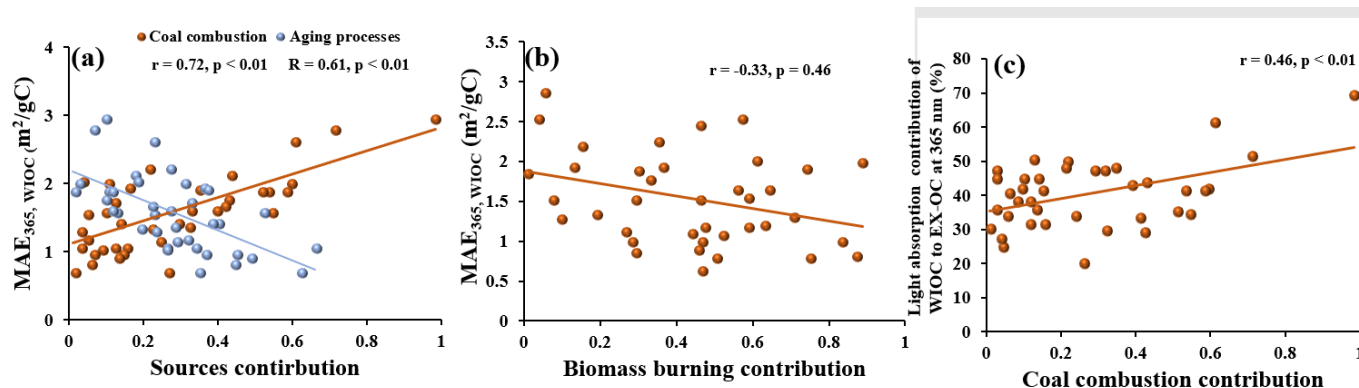

**Figure S3.** (a) The correlation of mass absorption efficient ( $MAE_{365}$ ) of WIOC to relative contribution of coal combustion (brown dots) and aging processes (blue dots). (b) The relationship between the  $MAE_{365}$  of WIOC and relative contribution of biomass burning. (c) The relationship between relative contribution of coal combustion and light absorption contribution of WIOC to EX-OC at 365 nm.

## References:

- Kiss, G., Varga, B., Galambos, I., Ganszky, I. (2002), Characterization of water-soluble organic matter isolated from atmospheric fine aerosol, *Journal of Geophysical Research-Atmospheres*, 107(D21).<https://doi.org/10.1029/2001jd000603>
- Lu, Z.F., Streets, D.G., Winijkul, E., Yan, F., Chen, Y.J., Bond, T.C., Feng, Y., Dubey, M.K., Liu, S., Pinto, J.P., Carmichael, G.R. (2015), Light Absorption Properties and Radiative Effects of Primary Organic Aerosol Emissions, *Environmental Science & Technology*, 49(8), 4868-4877.<https://doi.org/10.1021/acs.est.5b00211>
- Sun, H.L., Biedermann, L., Bond, T.C. (2007), Color of brown carbon: A model for ultraviolet and visible light absorption by organic carbon aerosol, *Geophysical Research Letters*, 34(17).<https://doi.org/10.1029/2007gl029797>
