# Supplementary material for: Water-insoluble organic carbon in PM 2.5 over China: light-absorbing properties, potential sources, radiative forcing effects and possible light-absorbing continuum
Source: Copernicus journal article supplement (doi:10.5194/egusphere-2024-130), 2024-02-19
Supplement: Supplementary file [file egusphere-2024-130-AC4-supplement.zip]

# The water-insoluble organic carbon in PM<sub>2.5</sub> of typical Chinese urban areas: light-absorbing properties, potential sources, radiative forcing effects and possible light-absorbing continuum

Yangzhi Mo<sup>1,2</sup>, Jun Li<sup>1,2</sup>, Guangcai Zhong<sup>1,2</sup>, Sanyuan Zhu<sup>1,2</sup>, Shizhen Zhao<sup>1,2</sup>, Jiao Tang<sup>1,2</sup>, Hongxing Jiang<sup>3</sup>, Zhineng Cheng<sup>1,2</sup>, Chongguo Tian<sup>4</sup>, Yingjun Chen<sup>3</sup>, Gan Zhang<sup>\*,1,2</sup>

<sup>1</sup> State Key Laboratory of Organic Geochemistry and Guangdong province Key Laboratory of Environmental Protection and Guangdong-Hong Kong-Macao Joint Laboratory for Environmental Pollution and Control, Guangzhou Institute of Geochemistry, Chinese Academy of Science, Guangzhou 510640, China

<sup>2</sup> CAS Center for Excellence in Deep Earth Science, Guangzhou, 510640, China

<sup>3</sup> Shanghai Key Laboratory of Atmospheric Particle Pollution and Prevention (LAP3), Department of Environmental Science and Engineering, Fudan University, Shanghai 200438, China

<sup>4</sup> Key Laboratory of Coastal Environmental Processes and Ecological Remediation, Yantai Institute of Coastal Zone Research, Chinese Academy of Sciences, Yantai, 264003, China

\*Corresponding author: Dr. Gan Zhang

E-mail: [zhanggan@gig.ac.cn](mailto:zhanggan@gig.ac.cn); Tel: +86-20-85290805; Fax: +86-20-85290706;

## Abstract

Water-insoluble organic carbon (WIOC) constitutes a substantial portion of organic carbon (OC) and contributes significantly to light absorption by brown carbon (BrC), playing pivotal roles in climate forcing. China as hotspots regions with high level of OC and BrC, information regarding the sources and light-absorbing properties of WIOC on national scale remains scarce. Here, we investigated the light-absorbing properties and sources of WIOC in ten representative urban cities in China. On average, WIOC made up  $33.4 \pm 7.66\%$  and  $40.5 \pm 9.73\%$  of concentrations and light absorption at 365 nm ( $Abs_{365}$ ) of extractable OC (EX-OC), which includes relatively hydrophobic OC (WIOC and humic-like substances: HULIS-C) and hydrophilic OC (non-humic-like substances: non-HULIS-C). The mass absorption efficiency of WIOC

at 365 nm ( $MAE_{365}$ ) was  $(1.59 \pm 0.55 \text{ m}^2/\text{gC})$  comparable to that of HULIS ( $1.54 \pm 0.57 \text{ m}^2/\text{gC}$ ) but significantly higher than non-HULIS ( $0.71 \pm 0.28 \text{ m}^2/\text{gC}$ ), indicating that hydrophobic OC possesses a stronger light-absorbing capacity than hydrophilic OC. Biomass burning (31.0%) and coal combustion (31.1%) were the dominant sources of WIOC, with coal combustion sources exhibited the strongest light-absorbing capacity. Moreover, employing the simple forcing efficiency ( $SFE_{300-700\text{nm}}$ ) method, we observed that WIOC exhibited the highest  $SFE_{300-700\text{nm}}$  ( $6.57 \pm 5.37 \text{ W/g}$ ) among the EX-OC fractions. The radiative forcing of EX-OC was predominantly contributed by hydrophobic OC (WIOC:  $39.4 \pm 15.5\%$  and HULIS:  $39.5 \pm 12.1\%$ ). Considering the aromaticity, sources, and atmospheric processes of different carbonaceous components, we propose a light-absorbing carbonaceous continuum, revealing that components enriched with fossil sources tend to possess stronger light-absorbing capacity, higher aromatic levels, increased molecular weights, and greater recalcitrance in the atmosphere. Reducing fossil fuel emissions emerges as an effective means of mitigating both gaseous ( $\text{CO}_2$ ) and particulate light-absorbing carbonaceous warming components.

## Highlights

- WIOC contributed significantly to both concentrations and the light absorption efficiency of extractable organic carbon.
- WIOC is primarily originated from biomass burning and coal combustion in China.
- WIOC displayed the highest radiative forcing among the extractable organic fractions.
- Carbonaceous components that are more enriched with fossil sources tend to exhibit stronger light-absorbing capacity, higher aromatic levels and molecular weight, and enhanced recalcitrance

## 1. Introduction

Organic carbon (OC) constitutes a substantial fraction (20 to 90%) of carbonaceous aerosols, playing an important role in human health, air quality and climate change (Jimenez et al., 2009; Zhang et al., 2007). Recent studies have shown that specific organic compounds could efficiently absorb radiation in near-ultraviolet (UV) and visible spectral regions, exhibiting a strong wavelength dependence (Laskin et al., 2015; Andreae and Gelencser, 2006). Due to its brownish or yellowish visible appearance, the light-

absorbing OC is term as brown carbon (BrC) (Sun et al., 2007; Saleh, 2020). Currently, model studies showed that the BrC account for ~20 to 40% of the light absorption of total carbonaceous aerosols globally, hence, BrC has the potential to counteract the cooling effects of OC, introducing considerable uncertainty into climate models (Bahadur et al., 2012; Feng et al., 2013; Saleh et al., 2015). Moreover, BrC may contribute to the generation of reactive oxygen species (ROS) in ambient aerosols, posing potential adverse effects on human health (Verma et al., 2012; Wang et al., 2023). To comprehensively understand and address the climate and health impacts of BrC, there is a critical need for thorough investigations into the sources and light-absorbing properties of OC.

65

According to water solubility, OC can be classified into two main categories: water-soluble OC (WSOC) and water-insoluble OC (WIOC). While WSOC has been extensively studied over the past decades, with investigations focusing on its sources, light-absorbing properties, and atmospheric processes (Bosch et al., 2014; Dasari et al., 2019; Mo et al., 2021; Wozniak et al., 2014; Wang et al., 2020). WIOC, which makes up large fraction of OC (~up to 80%) and a substantial portion of light absorption by BrC, has received comparatively less attention. WIOC exhibits a significantly higher light-absorbing capacity compared to WSOC, attributed to the enrichment of strong light-absorbing BrC chromophores in WIOC. For instance, certain strong BrC chromophores like polycyclic aromatic hydrocarbons (PAHs) and their derivatives, as well as high-molecular-weight oligomers, are water-insoluble (Huang et al., 2020; Xie et al., 2017; Kalberer et al., 2006). Indeed, Zhang et al. (2013) reported that the light absorption by methanol-extracted OC in Los Angeles was approximately 3 and 21 times higher than that by WSOC. Moreover, field observations indicate that WIOC exhibits greater recalcitrance during long-range transport processes compared to WSOC, leading to a longer lifetime for WIOC (Wozniak et al., 2012; Fellman et al., 2015; Kirillova et al., 2014). Given that WIOC represents a relatively long-lived OC component with a higher light-absorbing capacity, a comprehensive understanding of its sources and light-absorbing properties is imperative.

82

China as the hotspot regions of OC, the columnar mass concentration of BrC in China (4.4 to 92 mg/m<sup>2</sup>) is much higher than those in Europe and U.S.A (~5 mg/m<sup>2</sup>) (Arola et al., 2011; Zhang et al., 2017). While the sources and light-absorbing properties of WSOC have been extensively investigated in China (Huang et al., 2020; Jiang et al., 2020b; Wang et al., 2023; Cheng et al., 2016; Yan et al., 2017; Mo et al., 2021), corresponding information on WIOC remains limited, especially on a national scale. In this study, we

88 selected ten representative Chinese cities with urbanization rates ranging from 37.8% to 88.0% to represent  
89 the regions with different developed levels. The primary objectives are to explore the spatiotemporal  
90 variations in concentrations, light absorption properties, sources, and radiative effects of WIOC across these  
91 urban areas. Additionally, we integrate and make a comparison of light-absorbing properties data (mass  
92 absorption efficiency [MAE] and absorption Ångström exponent [AAE]) of OC with different polarities  
93 and BC from previous studies (Mo et al., 2021; Mo et al., 2024). This includes hydrophobic WSOC isolated  
94 by solid-phase extraction (SPE) referred to as humic-like substances (HULIS) and the hydrophilic WSOC  
95 referred to as non-HULIS. Finally, we propose a continuum concept of light-absorbing carbonaceous  
96 aerosols linked to aromaticity, sources, and atmospheric processes. This study provides insights into light-  
97 absorbing properties and sources of WIOC, contributing essential knowledge for a comprehensive  
98 understanding the role of WIOC in climate forcing and developing strategies to mitigate its climate impact.  
99

## 100 **2. Materials and Methods**

### 101 **2.1 Sampling**

102 PM<sub>2.5</sub> samples were collected across four seasons in ten cities in China. These cities included four with  
103 central heating systems (Beijing, Xinxiang, Lanzhou, and Taiyuan) and six without central heating  
104 (Shanghai, Nanjing, Chengdu, Guiyang, Wuhan, and Guangzhou), as shown in Figure 1. All the filter  
105 samples were collected on pre-combusted (450°C, 6h) quartz-fiber filter (Pall, England) from 2013 to 2014,  
106 use a high-volume sampler at a flow rate of ~ 1000L/min. Detailed information about the sampling methods  
107 can be found in our previous study (Mo et al., 2021; Mo et al., 2024). In brief, each sampling campaign  
108 spanned approximately 30 days for fall, winter, spring, and summer, respectively. Subsequently, a 20 mm  
109 diameter sample was excised from each filter during every season, and these were amalgamated into a  
110 single sample, with the exception of Guiyang, where only fall and winter samples were available. A total  
111 of 38 pooled samples were utilized in subsequent experiments. For each location, one pooled sample was  
112 obtained for each season, thus providing analytical results representing seasonal averages.  
113

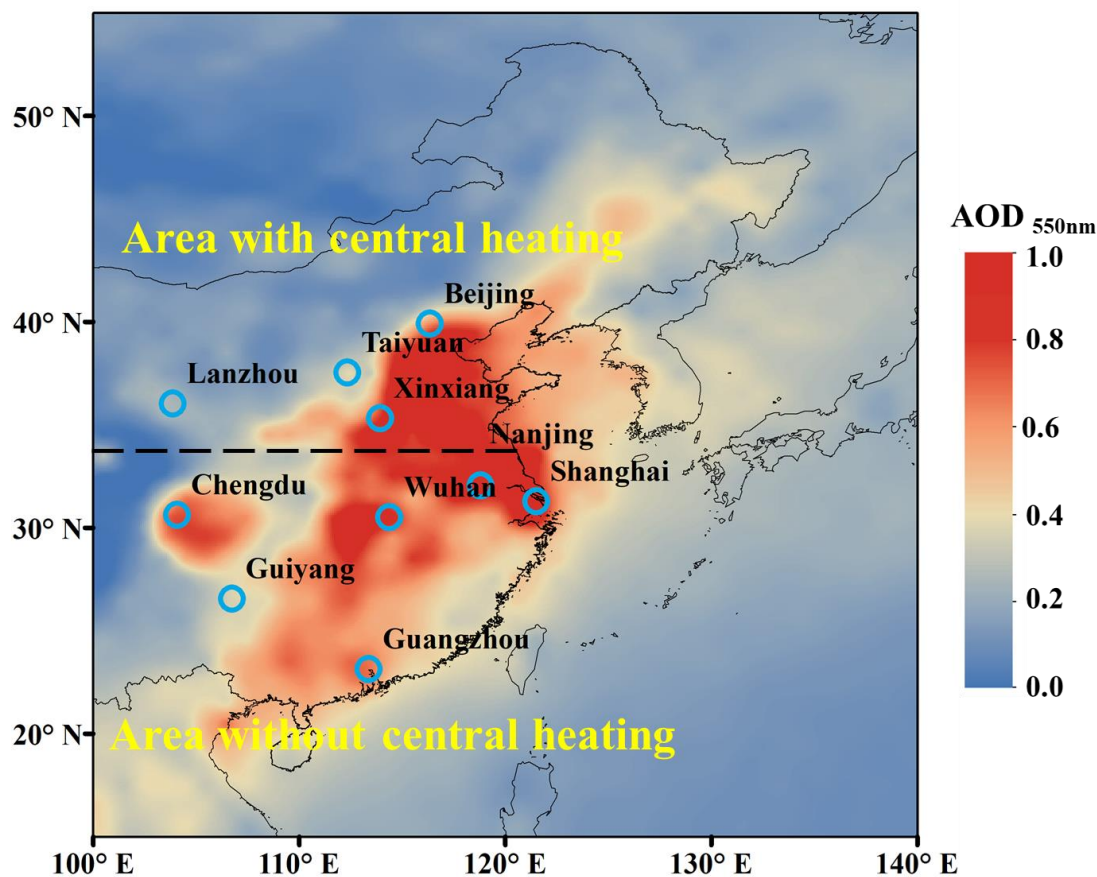

**Figure 1.** The average aerosol optical depth (AOD) at 550 nm retrieved from satellite (Terra/MODIS) observations over East Asia during October 2013 to August 2014. The locations of ten Chinese cities are shown in the map. Beijing, Xinxian, Lanzhou and Taiyuan located in the areas with central heating in cold seasons (fall and winter). Shanghai, Nanjing, Chengdu, Guiyang, Wuhan and Guangzhou located in the areas without central heating. The average annual temperature of with central heating the area with is usually below 15 °C, while the aeras without central heating is usually higher than 15 °C.

## 2.2 Chemical analysis

For water-soluble inorganic ions analysis, the filters were ultrasonically extracted with ultrapure water (18.2 MΩ cm) in a polypropylene vial for 30 min. Extracts were filtered through polytetrafluoroethylene (PTFE) syringe filters (Jinteng Ltd., Tianjin, China) of 0.22 μm pore size to remove particles and filter debris. Seven water soluble inorganic ions ( $\text{Na}^+$ ,  $\text{NH}_4^+$ ,  $\text{K}^+$ ,  $\text{Ca}^{2+}$ ,  $\text{Cl}^-$ ,  $\text{SO}_4^{2-}$ , and  $\text{NO}_3^-$ ) were determined by ion-chromatography (761 Compact IC, Metrohm, Switzerland, Text S1). The detection limit was below 0.05 mg/L for all ions.

For the solvent extraction, the water-soluble organic carbon (WSOC) in the pooled sample was

131 extracted with 100 mL ultrapure water (18.2 MΩ, Sartorius) under ultrasonication (30 min × 3 times).  
132 Following previous studies demonstrating that most water-insoluble organic carbon (WIOC) can be  
133 extracted in methanol (> 90%) (Chen and Bond, 2010; Chen et al., 2017; Cheng et al., 2016), the same  
134 sample underwent drip drying, and the WIOC was re-extracted methanol (OCEANPAK, HPLC-Grade, 30  
135 min × 3 times) using the same procedure. Both the methanol and water extracts were filtered through a 0.22  
136 μm PTFE membrane to remove insoluble particles. Both the methanol and water extracts were filtered  
137 through a 0.22 μm PTFE membrane to remove insoluble particles. The WSOC further separated into a  
138 relatively hydrophobic (humic-like substance, HULIS) and hydrophilic (non-HULIS) fraction (Lin et al.,  
139 2010a; Fan et al., 2012). HULIS are operationally defined by the procedure used for isolation from bulk  
140 WSOC by removing low molecular weight organic acids and inorganic ions. The HLB (Oasis, 30 μm, 60  
141 mg/cartridge, Waters, USA)-SPE method is most widely used to isolate HULIS due to its excellent  
142 reproducibility and high recovery yield (Fan et al., 2012; Lin et al., 2010b). Therefore, we used an HLB-  
143 SPE column to isolate the HULIS.

144  
145 The WSOC and HULIS-C content was determined using a TOC analyzer equipped with a  
146 nondispersive infrared (NDIR) detector (Shimadzu TOC-VCPH, Japan). The non-HULIS-C was estimated  
147 by the difference between WSOC and HULIS-C (non-HULIS-C = WSOC - HULIS-C). For WIOC  
148 measurement, 40 mL methanol extracts were evaporated to dryness under a nitrogen stream and re-  
149 dissolved with 1.0 mL methanol. A 20 μL aliquot of extracts was slowly spiked onto a 1.5 cm<sup>2</sup> prebaked  
150 quartz filter. After methanol evaporation, carbon on the quartz filter was quantified with an OC/EC analyzer  
151 (Sunset Laboratory Inc). The carbon contents of WIOC were determined by an OC/EC analyzer with  
152 standard deviation of reproducibility test less than 3%. The analysis mechanism of OC/EC analyzers and  
153 TOC analyzers differ, including the different catalysts and detectors they employ. However, it is important  
154 to note that both OC involve converting carbon in the sample to CO<sub>2</sub> and detecting CO<sub>2</sub> using a  
155 nondispersive infrared detector (NDIR) or a flame ionization detector (FID) after CO<sub>2</sub> conversion to  
156 methane. Thus, the analytical mechanisms are similar. Indeed, previous studies have systematically  
157 compared these two methods for determining WSOC in aerosols (Yu et al., 2002). The results have  
158 demonstrated no significant differences between the measurements obtained from the two methods.  
159 Therefore, the carbon content of various carbonaceous components determined by these two methods  
160 should be comparable. Based on extractable OC (EX-OC) polarity, the EX-OC was separated into WIOC,  
161 HULIS-C, and non-HULIS-C. All WSOC, HULIS-C, and WIOC concentrations presented in this study

were corrected with field blanks ( $0.39 \pm 0.16$ ,  $0.66 \pm 0.21$ , and  $1.75 \pm 0.48 \mu\text{gC}/\text{cm}^2$ , respectively).

## 2.3 Light absorption spectra measurement

The absorption spectra of sloven extracted fractions were recorded from 200 to 800 nm relative to ultrapure water by a UV-visible spectrophotometer (UV-4802, Unico, China). The light absorption coefficient was calculated according to following equation (Hecobian et al., 2010; Kirillova et al., 2014):

$$\text{Abs}_\lambda = (A_\lambda - A_{700}) \frac{V_l}{V_a \times l} \times \ln(10) \quad (1)$$

where  $\text{Abs}_\lambda$  is the light absorption coefficient ( $\text{Mm}^{-1}$ ),  $V_l$  is the volume of solvent for extraction (ml),  $V_a$  is the volume of sampled air ( $\text{m}^3$ ),  $l$  is the optical path length (in this case, 0.01 m), and  $A_\lambda$  is the absorption of the solution at a given wavelength. The average light absorption between 695 and 705 nm ( $A_{700}$ ) was used to account for baseline drift during analysis. The mass absorption coefficient (MAE,  $\text{m}^2/\text{gC}$ ) of sloven extracted OC fractions at wavelength of  $\lambda$  can be calculated as:

$$\text{MAE}_\lambda = \frac{\text{Abs}_\lambda}{C_i} \quad (2)$$

Where  $C_i$  is the corresponding concentration of WIOC, HULIS-C and non-HULIS-C in the air ( $\mu\text{gC}/\text{m}^3$ ).

The wavelength dependence of different OC fraction can be investigated by fitting the absorption Ångström exponent (AAE) by the following relation:

$$\text{Abs}_\lambda = K \times \lambda^{-\text{AAE}} \quad (3)$$

The AAE is calculated by a linear regression of  $\ln(\text{Abs}_\lambda)$  on  $\ln(\lambda)$  within the range 330-400 nm for the avoidance of interference by non-organic species (e.g.,  $\text{NO}_3^-$ ). The ratio of light absorption at 250 and 365 nm (E2/E3), which is negatively correlated with aromaticity and molecular weight of organics was also calculated (Peuravuori and Pihlaja, 1997; Baduel et al., 2010).

## 2.4 Positive matrix factorization (PMF) source apportionment

We applied U.S EPA PMF 5.0 model to qualitatively and quantitatively identify sources of WIOC and  $\text{Abs}_{365}$ , WIOC in this study. The principle and detailed process of this model could be found in Paterson (1999) and EPA 5.0 Fundamentals & User Guide. PMF model is a commonly used mathematical approach for the apportionment of  $\text{PM}_{2.5}$  sources abase on the characteristic chemical compositions or fingerprints in each source. The model decomposes the concentrations of the chemical species of samples (X) into sets of

191 contributions (G), factor profiles (F), and residuals (E):

192  $X = G \times F + E$  (4)

193 During the model calculation, factor contributions and profiles were derived by minimizing the objective  
194 function Q in PMF model:

195 
$$Q = \sum_{i=1}^m \sum_{j=1}^n \left( \frac{E_{ij}}{\sigma_{ij}} \right)^2$$
 (5)

196 where  $E_{ij}$  is the residual of each sample, and  $\sigma_{ij}$  is the uncertainty in the  $j$ th species for the sample  $i$ .

197

198 The measurement uncertainties were used for the error estimates of the measured concentrations. Data  
199 values below the method detection limit (MDL) were substituted with MDL/2. Missing data values were  
200 substituted with median concentrations. If the concentration is less than or equal to the MDL, the  
201 corresponding uncertainty (Unc) is 5/6 MDL. Otherwise, the uncertainty is calculated following equation:

202 
$$\text{Unc} = \sqrt{(\text{error fraction} \times \text{concentration})^2 + (0.5 \times \text{MDL})^2}$$
 (6)

203 We performed 100 random runs and retained the runs that produced minimum Q values for 3 to 10  
204 factors in base runs, five factors were obtained as the optimal solution as the source profiles in this study  
205 (Figure S1). The errors associated with both random and rotational ambiguity in the PMF solution were  
206 assessed using the bootstrap (BS) model and the displacement (DISP) model. The BS model involves  
207 estimating errors by resampling data matrices, with the resulting BS factors being aligned with the base run  
208 factors to gauge the reproducibility of different factors amidst random errors. Analysis using a 4-factor BS  
209 model indicated a factor mapping exceeding 85%, suggesting both the suitability of the number of factors  
210 and the presence of uncertainties. On the other hand, DISP primarily investigates rotational ambiguity  
211 within the PMF outcomes. Notably, in the context of a 4-factor PMF model, no swaps were identified in  
212 the DISP analysis.

213

## 214 **2.5 Radiative effect calculation**

215 The “simple forcing efficiency” (SFE, W/g) proposed by Bond and Bergstrom (2006) was used to  
216 estimate the potential direct radiative effects caused by light-absorbing OC. The SFE was originally used  
217 to represent the normalization of the particle mass (Chylek and Wong, 1995). Here, we focused on the light  
218 absorption effect of OC without the scattering effect. A wavelength-dependent SFE of light-absorbing OC  
219 as follows (Chen and Bond, 2010) :

$$\frac{dSFE_{abs}}{d\lambda} = D \frac{dS(\lambda)}{d\lambda} \tau_{atm}^2 (1 - F_c) \times 2\alpha_s \times MAC_i \quad (7)$$

where  $S$  and  $\tau_{atm}$  refer to solar irradiance and atmospheric transmission, respectively, with both being from ASTM G173–03 reference spectra ( $W/m^2$ ).  $D$  is the daytime fraction (0.5),  $F_c$  is the cloud fraction (0.6), and  $\alpha_s$  is the surface albedo (0.19 for Earth average).  $MAC_i$  is mass absorption cross section of sloven extracted OC (e.g., WIOC, HULIS and non-HULIS). Note that  $MAC$  refers to the particulate absorption per mass, while  $MAE$  is derived from absorption of the aqueous extracts.  $MAC$  can be compared with  $MAE$  only after considering the particulate effect (Sun et al., 2007) (Text S2). And then, the fraction of solar radiation absorbed by OC component with different polarity relative to total EX-OC is calculated as:

$$f_{OC_i/EX\_OC} = \frac{\sum_{\lambda=300}^{700} SFE_{OC_i}(\lambda) \times C_i \times \left(\frac{OA}{OC}\right)}{\sum \sum_{\lambda=300}^{700} SFE_{OC_i}(\lambda) \times C_i \times \left(\frac{OA}{OC}\right)} \quad (8)$$

Here, the integrated SFE is the sum of the SFE from 300 to 700 nm;  $C_i$  is the corresponding concentration of WIOC, HULIS-C and non-HULIS-C in the air ( $\mu gC/m^3$ ). The OA/OC ratios are 1.51, 1.91, 2.30 for WIOC, HULIS and non-HULIS, respectively (Kiss et al., 2002).

### 3. Results and Discussion

#### 3.1 Spatiotemporal variations in WIOC concentration and light-absorbing properties

In this study, water-insoluble organic carbon (WIOC) is defined as the residual OC re-extracted by methanol after water extraction, representing the OC only soluble in methanol. We define the OC extracted by water from the aerosol filter sample as WSOC, the WSOC is further separated into hydrophobic fraction (HULIS-C) and hydrophilic fraction (non-HULIS-C). The combined sum of WSOC and WIOC is defined as extractable OC (EX-OC). Figures 2 shows the spatial variation of concentration and  $Abs_{365}$  of separated EX-OC fractions across ten Chinese. The concentrations of WIOC ranged from 1.45 to 12.95  $\mu gC/m^3$ , with an average of  $3.64 \pm 2.53 \mu gC/m^3$  (average  $\pm$  one standard deviation) among the 10 cities (Figure 2a). Specifically, the areas with central heating exhibited significantly higher average WIOC concentrations compared to areas without central heating ( $4.79 \pm 3.39 \mu gC/m^3$  vs.  $2.81 \pm 1.16 \mu gC/m^3$ ,  $p < 0.01$ ), likely attributed to coal and biofuel combustion for domestic/central heating during the cooler period (Wang et al., 2023; Wang et al., 2020). Despite substantial spatial variation in WIOC concentration, its contribution

to EX-OC remained consistent at  $33.4 \pm 7.6\%$ , showing no significant spatial or temporal variations. Furthermore, the fractional carbon mass contributions of WIOC ( $33.4 \pm 7.6\%$ ), HULIS-C ( $35.2 \pm 5.8\%$ ), and non-HULIS-C ( $31.4 \pm 5.2\%$ ) to EX-OC were similar (Figure 2 and Table S1).

251

Consistent with spatial variation in WIOC concentration, the  $Abs_{365}$  of WIOC ( $Abs_{365, WIOC}$ ) serving as a proxy for BrC were significantly higher in areas with central heating compared to those without central heating ( $10.1 \pm 10.3 \text{ Mm}^{-1}$  vs.  $4.41 \pm 2.68 \text{ Mm}^{-1}$ ,  $p < 0.01$ ). Notably, the light absorbing contribution of WIOC ( $40.5 \pm 9.73\%$ ) to EX-OC exceeded its corresponding carbon mass contribution ( $33.4 \pm 7.55\%$ ). Actually, the light absorbing contribution of EX-OC are largely contributed by relatively hydrophobic OC components: the WIOC ( $40.5 \pm 9.73\%$ ) and HULIS ( $41.6 \pm 7.28\%$ ). In contrast, the non-HULIS fraction, being the most polar, contributed only  $17.5 \pm 5.02\%$  to  $Abs_{365, EX-OC}$  (Table S1). This suggests that the majority of light-absorbing organic compounds were enriched in the WIOC and HULIS fractions. Therefore, the mean mass absorption efficiency (MAE) spectra of WIOC and HULIS, representing the light-absorbing capacity per unit carbon mass, were higher than those of non-HULIS (Figure 2c).

261

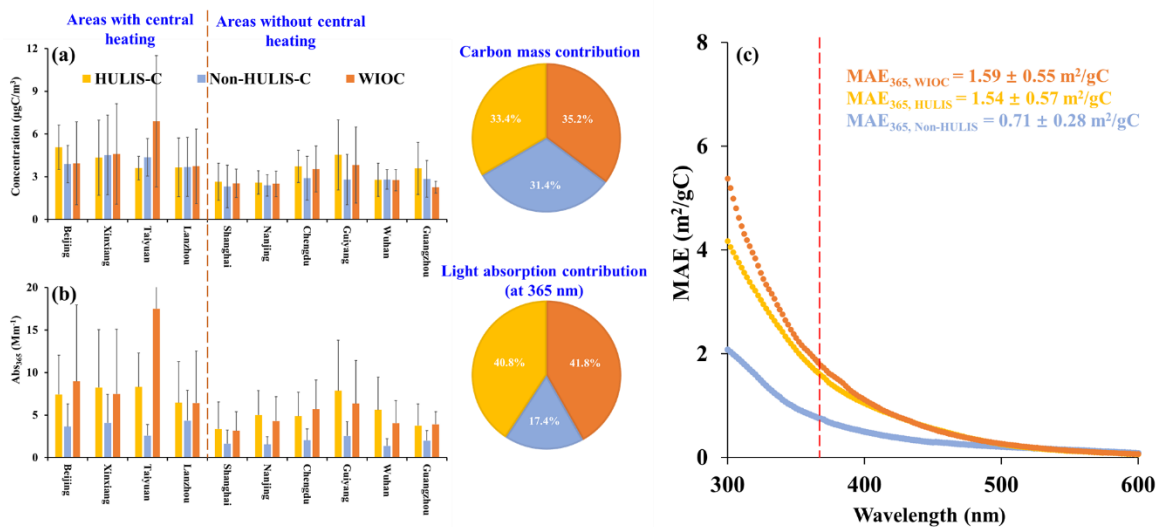

262

263

**Figure 2.** The spatial variation of concentration and light absorption of extractable OC from ten Chinese cities. (a) The spatial variations of concentration of WIOC, HULIS-C and non-HULIS-C in PM<sub>2.5</sub> from ten Chinese cities; (b) The spatial variations of light absorption coefficients of WIOC, HULIS-C and non-HULIS-C at 365 nm ( $Abs_{365}$ ) in PM<sub>2.5</sub> from ten Chinese cities; The pie charts in the left of panel (a) and (b) represent the carbon mass contribution and light absorption contribution, respectively. (c) The mean of mass absorption efficient (MAE) of WIOC, HULIS and non-HULIS from 300 nm to 600 nm; The red dash line represents the MAE<sub>365</sub>.

270

271

272 The MAE at 365 nm ( $MAE_{365}$ ) is commonly used to reflect the light-absorbing capacity of solvent  
273 extracted-BrC. Among the extractable OC components, the  $MAE_{365}$  of WIOC is the highest, with average  
274 of  $1.59 \pm 0.55 \text{ m}^2/\text{gC}$ . This value is comparable to the WIOC in Xi'an ( $1.5 \pm 0.5 \text{ m}^2/\text{gC}$ ) and Beijing ( $1.5 \pm$   
275  $0.4 \text{ m}^2/\text{gC}$ ) (Huang et al., 2020), but  $\sim 5$  times higher than values reported in Nagoya, Japan ( $0.2$  to  $0.4$   
276  $\text{m}^2/\text{gC}$ ) (Chen et al., 2016). The  $MAE_{365}$  of WIOC is comparable to HULIS ( $1.54 \pm 0.57 \text{ m}^2/\text{gC}$ ), however,  
277 higher than the non-HULIS as relatively polar water-soluble fraction ( $0.71 \pm 0.28 \text{ m}^2/\text{gC}$ ). This discrepancy  
278 is likely attributed to the non-HULIS fraction mainly comprising highly oxidized organic matter lacking  
279 long aromatic conjugated systems (Chen et al., 2017; Chen et al., 2016). It should be noted that light  
280 absorption of BrC, as measured by solvent extraction, appears to be underestimated compared to under  
281 ambient aerosol conditions. To accurately derive the corresponding BrC absorption in ambient aerosols, it  
282 is necessary to calibrate the absorption determined in solvent extracts using a correction factor. Presently,  
283 the correction factor proposed by Liu et al. (2013), typically set at 2, is widely employed for this purpose.  
284 Despite WIOC being recognized as the most light-absorbing OC component, even after applying this  
285 correction factor, we observed that the MAE of WIOC at 550 nm ( $0.28 \pm 0.09 \text{ m}^2/\text{gC}$ ) remains an order of  
286 magnitude lower than that of amorphous tar ball BrC (approximately  $3.6$  to  $4.1 \text{ m}^2/\text{g}$ ) and unextractable  
287 "dark BrC" (approximately  $1.2 \text{ m}^2/\text{g}$ ) as determined by transmission electron microscopy (Alexander et al.,  
288 2008; Chakrabarty et al., 2023), indicating the light-absorbing capacity of the extractable OC is relatively  
289 weakly.

290

291 The  $MAE_{365}$  of WIOC exhibited significant seasonal variation, with higher values in cold seasons  
292 ( $1.74 \pm 0.64 \text{ m}^2/\text{gC}$ , fall and winter) than in warm seasons ( $1.48 \pm 0.46 \text{ m}^2/\text{gC}$ , spring and summer, Figure  
293 3a). This variation is likely linked to changes in sources and atmospheric processes influencing the light-  
294 absorbing compounds within the WIOC fraction. During cold seasons, large usage of coal combustion and  
295 biomass burning (BB) for central/domestic heating may elevate the emission of the WIOC with high  
296  $MAE_{365}$  (Tang et al., 2020; Song et al., 2019), consequently enhancing the overall  $MAE_{365}$  of WIOC.  
297 Conversely, stronger photobleaching effects and lower emissions from coal combustion and BB during  
298 warm seasons may contribute to a decrease of  $MAE_{365}$  of WIOC (Saleh et al., 2013; Wong et al., 2017).  
299 Interestingly, all extractable OC components exhibit a consistent seasonal pattern (cold > warm) in their  
300  $MAE_{365}$ , indicating similar influences of sources and atmospheric processes on the light-absorbing capacity  
301 of these components irrespective of polarity. Spatially, the  $MAE_{365}$  of WIOC was significantly higher in

302 areas with central heating than without central heating ( $1.75 \pm 0.64 \text{ m}^2/\text{gC}$  vs.  $1.48 \pm 0.46 \text{ m}^2/\text{gC}$ ,  $p < 0.01$ ).  
303 The difference in  $\text{MAE}_{365}$  of WIOC between the areas with and without central heating was more  
304 pronounced during colder seasons ( $2.20 \pm 0.51 \text{ m}^2/\text{gC}$  vs.  $1.81 \pm 0.28 \text{ m}^2/\text{gC}$ , 21.5% difference) than  
305 warmer seasons ( $1.29 \pm 0.37 \text{ m}^2/\text{gC}$  vs.  $1.17 \pm 0.26 \text{ m}^2/\text{gC}$ , 10.3% difference). Given that coal consumption  
306 for central/domestic heating is considerably higher in areas with central heating compared to those without,  
307 it is plausible that the spatial variability in  $\text{MAE}_{365}$  of WIOC is predominantly influenced by coal  
308 combustion.

309

310 The distinct seasonal variation of light-absorbing capacity of WIOC may be affected by the structure  
311 of light-absorbing compounds within WIOC. AAE reflects both the wavelength dependent light absorption  
312 and aromaticity of the carbonaceous aerosols, and the AAE usually negatively related with the aromaticity  
313 (Chen et al., 2017; Mo et al., 2017; Zhang et al., 2013). BC as most condensed aromatic and strongest light-  
314 absorbing carbonaceous, exhibits an AAE of  $\sim 1$  (Bond, 2001; Kirchstetter et al., 2004). In the case of BrC  
315 in solvent extracts, AAE values typically vary from  $\sim 3$  to 16 (Hecobian et al., 2010; Mo et al., 2021; Chen  
316 and Bond, 2010). Generally, During photobleaching aging processes, the MAE of BrC in solvent extracts  
317 tends to decrease with increasing AAE values, indicative of a reduction in aromaticity (Dasari et al., 2019).  
318 Despite the stronger radiation and lower  $\text{MAE}_{365}$  of WIOC in warm seasons, AAE values did not exhibit  
319 seasonal variation ( $4.59 \pm 0.52$  vs.  $4.77 \pm 0.65$ ,  $p > 0.05$ , Figure 3b). This may be due to the more complex  
320 factors affecting the AAE values, which are not only affected by sources and atmospheric processes (Saleh  
321 et al., 2013; Tang et al., 2020; Dasari et al., 2019), but also by the solvents and the pH of water extracts  
322 applied in the determination (Chen et al., 2016; Mo et al., 2017; Phillips et al., 2017). However, the AAE  
323 values for WIOC ( $4.69 \pm 0.59$ ) were comparable to those of HULIS ( $4.72 \pm 0.53$ ) but lower than those of  
324 non-HULIS ( $7.33 \pm 2.56$ ). This suggests a tendency for AAE to increase with the polarity of OC  
325 components, in agreement with findings from Los Angeles and Nagoya (Chen et al., 2016; Zhang et al.,  
326 2013). This indicated that relatively hydrophobic fractions (e.g., WIOC and HULIS) contain more aromatic  
327 light-absorbing compounds than non-HULIS.

328

329 In contrast, the seasonal variation is more pronounced for the ratio of light absorption at 250 and 365  
330 nm ( $\text{E2/E3}$ ), inversely proportional to the molecular weight (MW) and aromaticity of natural organic matter  
331 (Baduel et al., 2010; Peuravuori and Pihlaja, 1997). The  $\text{E2/E3}$  of WIOC was lower in cold seasons  
332 compared to warm seasons ( $4.33 \pm 0.49$  vs.  $4.51 \pm 0.048$ ,  $p < 0.01$ , Figure 3c), suggesting the WIOC

333 exhibited greater conjugations and aromaticity in cold seasons. Notably, the E2/E3 ratio exhibits a stronger  
334 correlation with combustion source tracers (e.g.,  $K^+$  and  $Cl^-$ ) during cold seasons ( $K^+$ :  $r = 0.37$ ,  $p = 0.02$  vs.  
335  $r = 0.34$ ,  $p > 0.1$ ;  $Cl^-$ :  $r = 0.56$ ,  $p = 0.011$  vs.  $r = 0.16$ ,  $p > 0.1$ ) than in warm seasons, indicating that coal  
336 combustion and BB contribute to higher aromaticity of WIOC during cold seasons (Duarte et al., 2005; Fan  
337 et al., 2016). Indeed, coal combustion and BB are important sources of OC with high level aromatic  
338 compounds (e.g., PAHs). Additionally, the slower photo-degradation and volatilizations of aromatic  
339 compounds in lower temperature also enhanced the aromatic level of WIOC in cold seasons (Samburova  
340 et al., 2007; Zhang et al., 2020b). Similar to AAE, the E2/E3 of extractable OC components exhibited a  
341 consistent trend of increasing with the polarity of OC (WIOC:  $4.41 \pm 0.49 < \text{HULIS}$ :  $4.93 \pm 0.50 < \text{non-}$   
342  $\text{HULIS}$ :  $7.00 \pm 0.42$ ,  $p < 0.01$ ), suggesting that less polar organics likely have higher aromaticity and higher  
343 MW. However, in contrast to AAE, all E2/E3 ratios of the EX-OC components exhibited the same seasonal  
344 variation (cold > warm, Figure 3c). This implies that the E2/E3 ratio, calculated using two wavelengths,  
345 maybe more effective than the AAE calculated using multiple wavelengths when reflecting changes in the  
346 structure of organic components. The seasonal variation in the structure and light-absorbing properties of  
347 WIOC is largely influenced by sources, we further explore the source of WIOC, as discussed below.

348

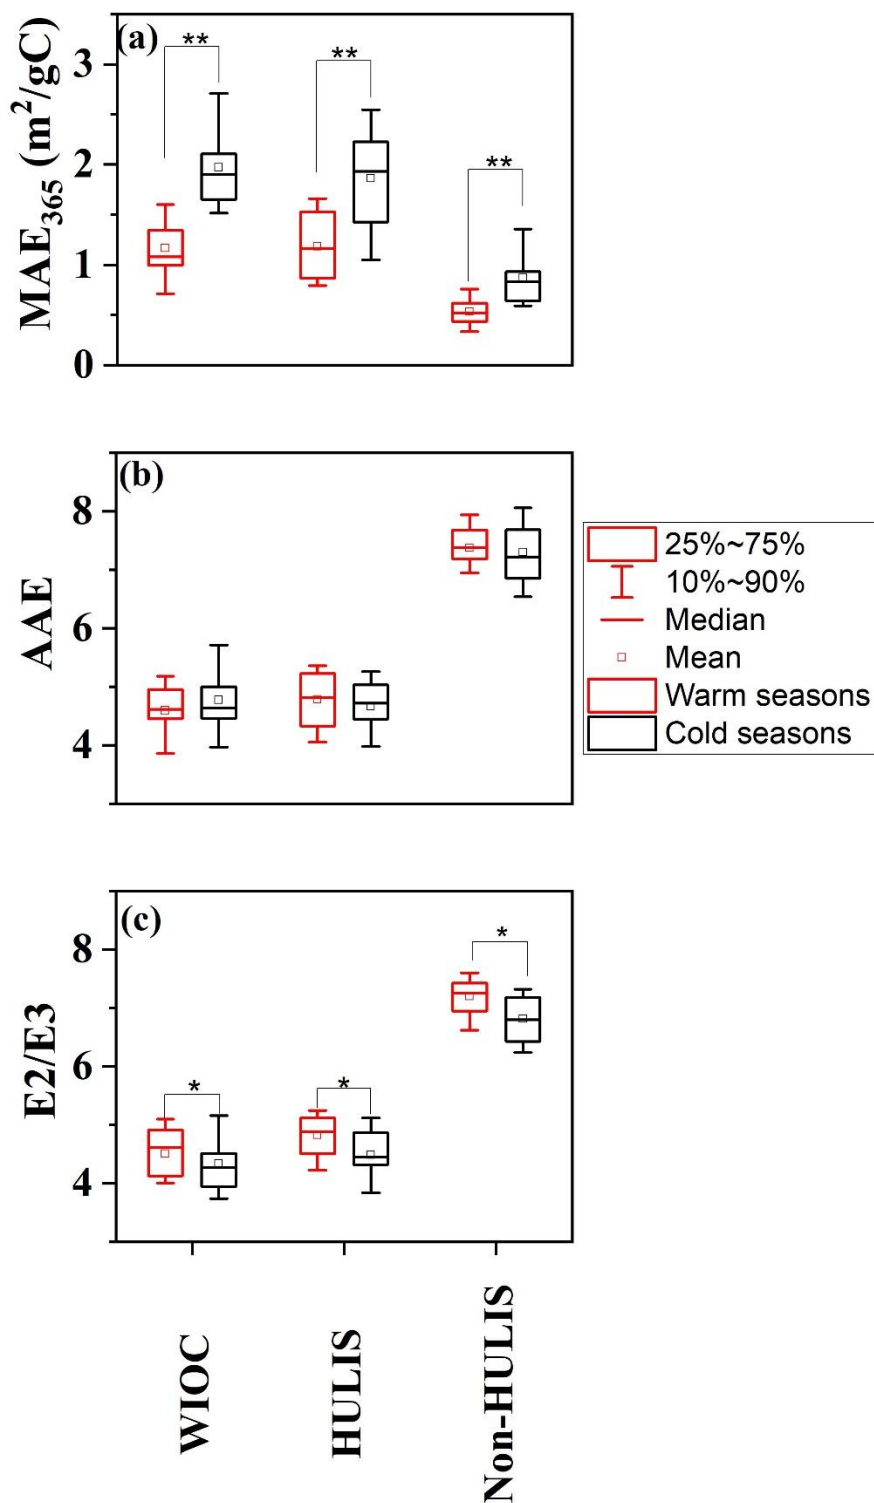

**Figure 3.** The seasonal variations of (a) AAE, (b) E2/E3 and (c)  $MAE_{365}$  for the WIOC, HULIS and WSOC. “\*” indicates the difference at  $p < 0.05$  level; “\*\*” indicates the difference at  $p < 0.01$  level

### 3.2 The sources of WIOC: coal combustion exhibited the strongest light-absorbing capacity

In order to better understand the source of WIOC and BrC in WIOC fraction, correlation of WIOC and

356 Abs<sub>365, WIOC</sub> to water-soluble ions were investigated. Although the WIOC exhibited strong correlation with  
 357 Abs<sub>365, WIOC</sub> ( $r = 0.97, p < 0.01$ ) for the entire year, as listed in Table S2, the correlations between WIOC  
 358 and Abs<sub>365, WIOC</sub>, as well as WIOC and water-soluble ions, differed notably between warm and cold seasons.  
 359 This discrepancy suggests differences in sources and formation processes of WIOC and light-absorbing  
 360 compounds between warm and cold season. During cold seasons, both WIOC and Abs<sub>365, WIOC</sub> exhibited  
 361 good relationship with most of the water-soluble ions (Table S2). Conversely, in warm seasons, WIOC  
 362 showed poor correlation with most water-soluble ions, except for  $\text{NH}_4^+$  ( $r = 0.51, p < 0.05$ ). Compared with  
 363 the WIOC, the Abs<sub>365, WIOC</sub> correlated well with most water-soluble ions ( $r = 0.63, 0.53, 0.51$  and  $0.59$  for  
 364  $\text{Cl}^-$ ,  $\text{NO}_3^-$ ,  $\text{SO}_4^{2-}$ , and  $\text{NH}_4^+$ , respectively,  $p < 0.05$ , Table S2), except the  $\text{K}^+$  ( $r = 0.25, p > 0.05$ ), in warm  
 365 seasons. This suggests that the difference in sources and formation processes in WIOC and light-absorbing  
 366 compounds in warm seasons.

367  
 368 To better quantify the seasonal variation of the sources of WIOC and BrC in WIOC fraction, we  
 369 quantified the sources for both WIOC concentrations and light absorption of WIOC (Abs<sub>365, WIOC</sub>) using the  
 370 PMF receptor model in this study. The model identified five factors with uncertainties below 12%, and their  
 371 profiles are presented in Figure S1. Factor 1 exhibited a high  $\text{Cl}^-$  loading (57.0%), which a typical tracer  
 372 for BB, coal combustion and sea-salt aerosols. Sea-salt derived  $\text{Cl}^-$  is considered as a significant source of  
 373  $\text{Cl}^-$  in  $\text{PM}_{2.5}$  in coastal cities. In this study, we assessed the contribution of sea-salt  $\text{Cl}^-$  ( $[\text{ss-Cl}^-] = [\text{ss-}$   
 374  $\text{Cl}^-] = 1.17 \times [\text{Na}^+]$ ) to the total  $\text{Cl}^-$ . We found that even in the coastal cities, such as Guangzhou and  
 375 Shanghai, the contribution of sea-salt  $\text{Cl}^-$  to total  $\text{Cl}^-$  was generally below  $\sim 7\%$ . Thus, the high loading of  
 376  $\text{Cl}^-$  is not likely caused by the sea-salt aerosols.  $\text{K}^+$  as typical tracer for BB, the loading of  $\text{K}^+$  (11.7%) was  
 377 relatively low in Factor 1. Further, Factor 1 displayed a ratio of Abs<sub>365, WIOC</sub> to WIOC ( $2.46 \text{ m}^2/\text{gC}$ )  
 378 comparable to the MAE<sub>365</sub> of WIOC from coal combustion (Tang et al., 2020). Consequently, Factor 1 was  
 379 classified as a source related to coal combustion. Factor 2 was characterized by the highest loading of  $\text{K}^+$   
 380 (45.8%) and HULIS-C (44.1%), thus, this factor was identified as BB. Factor 3 exhibited enrichment in  
 381  $\text{SO}_4^{2-}$  (46.0%) and non-HULIS-C (18.2%), both recognized as key components in atmospheric aging  
 382 processes (Du et al., 2014). Notably, the ratio of Abs<sub>365, WIOC</sub> to WIOC in Factor 3 was the lowest ( $0.55$   
 383  $\text{m}^2/\text{gC}$ ) among the identified factors. This observation suggests a probable loss of light-absorbing capacity  
 384 during aging/bleaching processes. Thus, Factor 3 is interpreted as the source associated with aging  
 385 processes. Factor 4 is related to high loading of  $\text{NO}_3^-$  (56.2%) and  $\text{NH}_4^+$  (34.8%). Given that SOA formed  
 386 under high  $\text{NO}_x/\text{NH}_3$  conditions often exhibits high light-absorbing capacity (Xie et al., 2017; Lin et al.,

2018), and considering the relatively high ratio of  $\text{Abs}_{365, \text{WIOC}}$  to WIOC ( $2.13 \text{ m}^2/\text{gC}$ ) observed in Factor 4, we attribute Factor 4 to be a source related to nitrogen-induced SOA formation. Factor 5, characterized by the highest loading of  $\text{Ca}^{2+}$  (65.7%). Ca is identified as tracer of fugitive dust (Han et al., 2007). The predominance of Ca in Factor5, which points to sources such as resuspended dust and soil sources. Both the predicted WIOC concentrations ( $R^2 = 0.92$ ) and  $\text{Abs}_{365, \text{WIOC}}$  ( $R^2 = 0.91$ , Figure S2) correlated well with the corresponding measured values, confirming the reliability of PMF solution.

Figure 4a shows the annual average contributions of the identified sources to WIOC resolved by PMF model. The primary sources of WIOC were combustion sources, with coal combustion and BB averagely account for 31.1% and 31.0% of the WIOC, respectively. Although the contribution of coal combustion to WIOC was comparable to that of BB, both exhibited distinct spatial and seasonal variations (Figure 4a). Specifically, during winter, coal combustion emerged as the dominant source of WIOC, accounting for 48.4% of the total, likely driven by increased coal usage in areas with central heating. Indeed, coal combustion constituted the primary source of WIOC in areas with central heating during cold seasons (56.2%). In contrast, in areas without central heating, the contribution of BB surpassed that of coal combustion significantly (54.2% vs. 17.3%). Therefore, coal combustion and BB were identified as the predominant sources of WIOC in areas with and without central heating, respectively, during cold seasons. Compared to primary emissions sources, the contributions of the sources related to aging processes and nitrogen-induced secondary formation were relatively lower, accounting for 18.2% and 5.2% of the WIOC, respectively. That may be due to these two secondary sources are more enriched in water-soluble components (HULIS-C + non-HULIS-C). Actually, although the uncertainties of sources contribution of HULIS-C and non-HULIS-C resolved by PMF model may be high, the aging processes and nitrogen-related secondary formation contributed 10.1% and 20.2% to HULIS-C, and 18.3% and 21.6% to non-HULIS-C, respectively. In addition, during the summer, when both temperature and solar radiation intensity rise, the contributions from aging processes and BB increased to 39.3% and 41.3%, respectively. In spring, a significant fraction of WIOC was associated with dust/soil, reaching up to 28.8%. Specially, the dust/soil contribution was much higher in the aeras with central hearing than those without central heating. This is consistent with the fact that sandstorms from the Gobi desert that borders China and Mongolia ride springtime winds to affect the air quality of Northern China (Filonchyk et al., 2024).

Figure 4c shows the contributions of sources identified by PMF model to the  $\text{Abs}_{365, \text{WIOC}}$ . Generally,

418 coal combustion (46.5%) and BB (30.0%) dominate  $Abs_{365, WIOC}$ , while other sources just contribute 23.8%  
 419 (aging processes: 6.1%, nitrogen-related secondary formation: 6.7%, and dust/soil: 10.8%) of  $Abs_{365, WIOC}$ .  
 420 Annually, even though the mass contributions of coal combustion and BB to WIOC are comparable, coal  
 421 combustion is the largest contributor to  $Abs_{365, WIOC}$ , surpassing BB. This difference is likely because coal-  
 422 derived WIOC has a stronger light-absorbing capacity than BB. The seasonal variation of sources  
 423 contribution of  $Abs_{365, WIOC}$  is similar to that of carbon mass contribution. Coal combustion is the dominant  
 424 contributor to  $Abs_{365, WIOC}$  in winter (62.5%), but its contribution diminishes in other seasons, suggesting  
 425 that the enhanced light absorption of WIOC in winter is driven by coal combustion. In summer, the elevated  
 426 solar radiation and temperatures can promote the secondary generation of BrC, with secondary BrC being  
 427 more enriched in the WSOC. Previous studies have observed a significant contribution of secondary sources  
 428 to WSBrc during summer (Yan et al., 2017; Du et al., 2014). However, the BrC within WIOC tends to be  
 429 more enriched with primary sources such as BB and coal combustion (Figure 4c). As temperatures rise in  
 430 summer, coal consumption typically declines. Consequently, during summer,  $Abs_{365, WIOC}$  is predominantly  
 431 contributed by BB (Figure 4d). In spring, the contribution of dust/soil to  $Abs_{365, WIOC}$  reaches up to 26.6%,  
 432 likely due to the presence of humic substances with strong light-absorbing capacity in dust/soil (Andreae  
 433 and Gelencser, 2006).  
 434

435 The source of BrC significantly influences its light absorption capacity. For WIOC, the contribution  
 436 from aging processes shows a negative correlation with the  $MAE_{365}$  of WIOC ( $r = -0.61$ ,  $p < 0.01$ , Figure  
 437 S3a), indicating that the chromophores in WIOC were bleached during aging processes. Both BB and coal  
 438 combustion are recognized as the sources of BrC with strong light-absorbing capacity. We found that  
 439 contribution of BB exhibited a negative correlation with  $MAE_{365, WIOC}$  ( $r = -0.34$ ,  $p = 0.46$ , Figure S3b),  
 440 whereas a strong positive correlation was observed for coal combustion ( $r = 0.72$ ,  $p < 0.01$ , Figure S3a).  
 441 These suggest that the light-absorbing compounds derived from coal combustion have a stronger light-  
 442 absorbing capacity than BB, and enhanced the overall  $MAE_{365, WIOC}$ . Moreover, the contribution from coal  
 443 combustion is also significantly positively correlated with the light absorption contribution of WIOC to  
 444 EX-OC ( $Abs_{365, WIOC}/Abs_{365, EX-OC}$ ,  $r = 0.46$ ,  $p < 0.01$ , Figure S3c). This implies that the strong light-  
 445 absorbing compounds emitted from coal combustion tend to be water-insoluble. It is noteworthy that, based  
 446 on carbon isotopes ( $\delta^{13}C$  and  $\Delta^{14}C$ ), coal combustion is identified as the major source of strong light-  
 447 absorbing components in the water-soluble fraction in China (Mo et al., 2021; Mo et al., 2024). Therefore,  
 448 coal combustion is the dominant source of EX-OC with strong light-absorbing capacity in China, which

enhances the overall color of EX-OC.

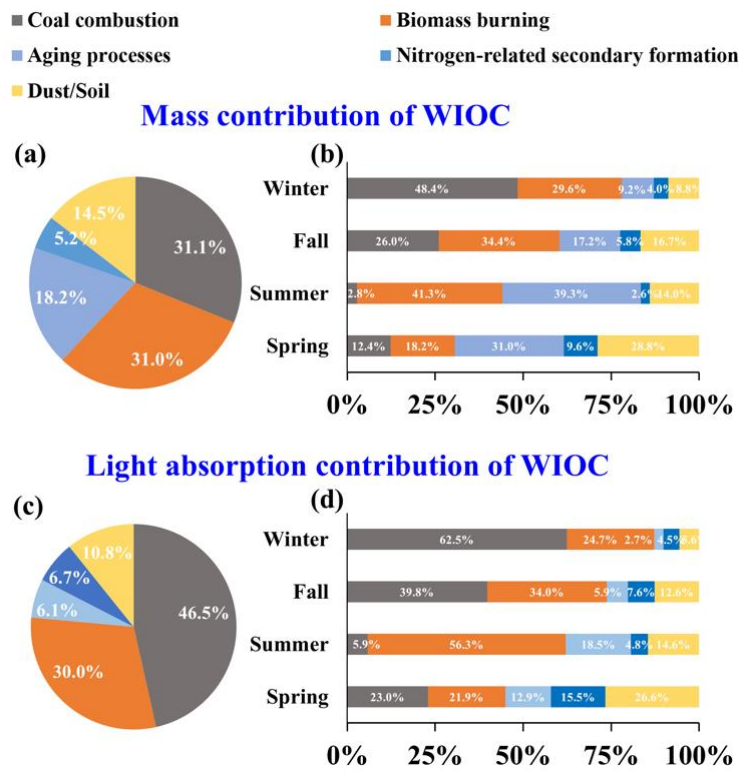

**Figure 4.** (a) Annual and (b) seasonal sources apportionments result of WIOC mass concentration. (c) Annual and (d) seasonal sources apportionments of WIOC light absorption at 365 nm.

### 3.3 Radiative forcing of WIOC

The potential radiative of WIOC was estimated by a “simple forcing efficiency” (SFE) method, as described in section 2.5 (Bond and Bergstrom, 2006; Chylek and Wong, 1995). The wavelength-dependent absorption SFE from 300 to 700 nm for WIOC, HULIS and non-HULIS are shown in Figure 5a. The integrated mean SFE from 300 to 700 nm ( $SFE_{300-700}$ ) is highest for WIOC ( $6.57 \pm 5.37$  W/g), followed by HULIS ( $4.39 \pm 1.79$  W/g) and non-HULIS ( $1.23 \pm 1.03$  W/g). This order is consistent with the  $MAE_{365}$  of these three fractions (Figure 2c). Comparing the SFE values with previous reports in Chinese cities, the values for WIOC and HULIS fall within the reported range (Hong Kong: 4.40 W/g, Tianjin:  $6.30 \pm 2.30$  W/g, Xi'an:  $3.51 \pm 2.36$  W/g, all for WSOC)(Deng et al., 2022; Li et al., 2023; Zhang et al., 2020a) , but lower than that in Kanpur, India (19.2 W/g, for WSOC) (Choudhary et al., 2021). It is important to note that the SFE values presented here are calculated from bulk light absorbance measurements of the extracts, which tend to be lower than corresponding values from filter-based optical transmission measurements (Li et al., 2020).

468 The radiative effect of light-absorbing OC is generally related to its atmospheric concentration. In  
 469 equation (8), the concentrations of WIOC, HULIS, and non-HULIS were further taken into account and  
 470 used to estimate their relative contributions to the solar radiation absorbed by EX-OC (Figure 5b). The  
 471 fraction of radiative forcing by WIOC ( $39.4 \pm 15.5\%$ ) was almost equal to that of HULIS ( $39.5 \pm 12.1\%$ ),  
 472 but much higher than non-HULIS ( $21.1 \pm 10.2\%$ ). This result suggests that the radiative forcing of EX-OC  
 473 is dominantly contributed by the relatively hydrophobic OC fractions, making them efficient radiative-  
 474 forcing agents. In contrast, consistent with previous studies, the radiative effects of oxidized OC fractions  
 475 are relatively limited (Tian et al., 2023). Overall, the radiative forcing of different components of OC is  
 476 highly inhomogeneous, likely associated with their sources and atmospheric processes.  
 477  
 478

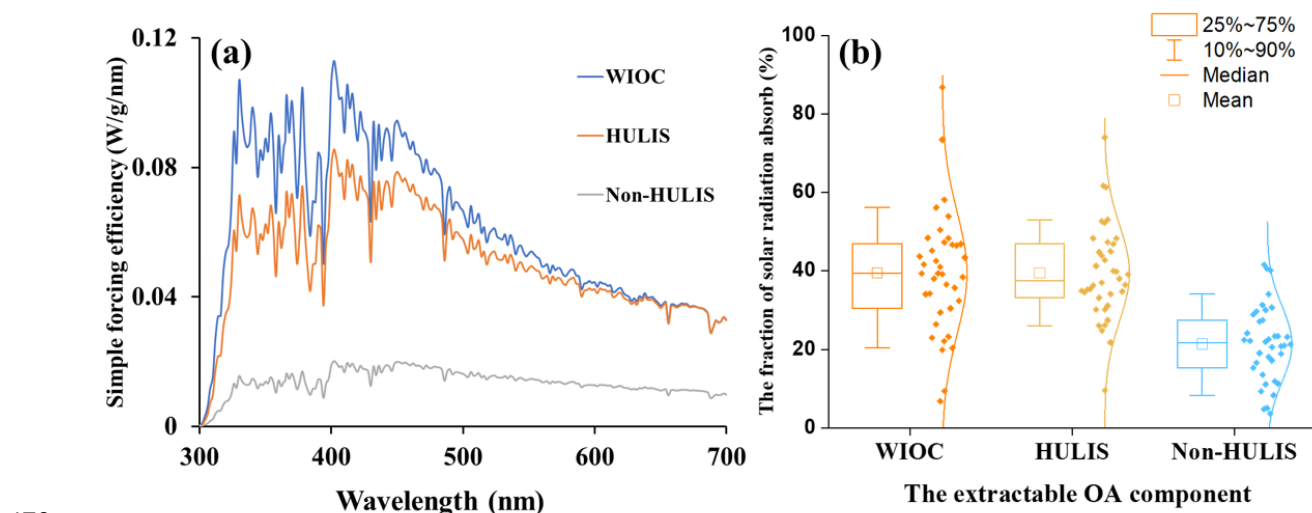

479  
 480 **Figure 5.** (a) The average simple forcing efficiency (SFE) of the WIOC, HULIS and WSOC from 300 to  
 481 700 nm; (b) The fraction of solar radiation absorbed by WIOC, HULIS and non-HULIS relative to total  
 482 extractable OC. The relative fraction of non-HULIS is calculated by the difference between WSOC and  
 483 HULIS.  
 484  
 485

### 486 **3.4 Possible continuum of light-absorbing carbonaceous components: aromaticity,** 487 **sources, and atmospheric processes**

488 The light-absorbing carbonaceous aerosols has conventionally been classified into BC and BrC.  
 489 Following the classification framework introduced by Saleh (2020), we mapped the BC and BrC in an  
 490 AAE-logMAE<sub>405</sub> space. Within the space, BrC can be further categorized into the following: very weakly

(VW), weakly (W), moderately (M), and strongly (S) light-absorbing BrC. In this framework, hydrophobic OC, represented by WIOC and HULIS, falls into the M-BrC area. On the other hand, the relatively hydrophilic OC (e.g., non-HULIS) is skewed more toward the W-BrC area (Figure 6a). It is important to note that WIOC in this study refers to OC that is insoluble in water but soluble in methanol. Thus, WIOC, HULIS, and non-HULIS are considered as extractable OC, implying that all solvent-extractable OC falls within the W- and M-BrC categories. It should be emphasized that S/Dark-BrC, characterized by light-absorbing properties similar to BC, is typically unextractable, as demonstrated in previous studies (Chakrabarty et al., 2023; Corbin et al., 2019). Similarly, BC is traditionally considered unextractable and exhibits the strongest light-absorbing capacity among the various carbonaceous components. According to the chemical and physical properties, BC can be further subdivided into soot-BC and char-BC (Han et al., 2010; Masiello, 2004). Char and soot are defined differently across various environmental matrices (Coppola et al., 2022). For the carbonaceous aerosols, the char-BC and soot-BC are widely and operationally defined by different temperatures in the Interagency Monitoring of Protected Visual Environments (IMPROVE) protocol and the thermal-optical reflectance (TOR) method for OC and EC analysis (Cai et al., 2023; Han et al., 2010). Generally, the light-absorbing capacity of soot-BC is higher than char-BC (Andreae and Gelencser, 2006; Corbin et al., 2019; Schnaiter et al., 2003). The gradual enhancement of the light-absorbing capacity within the carbonaceous components is intricately linked to their molecular structure, specific sources, and atmospheric processes.

509

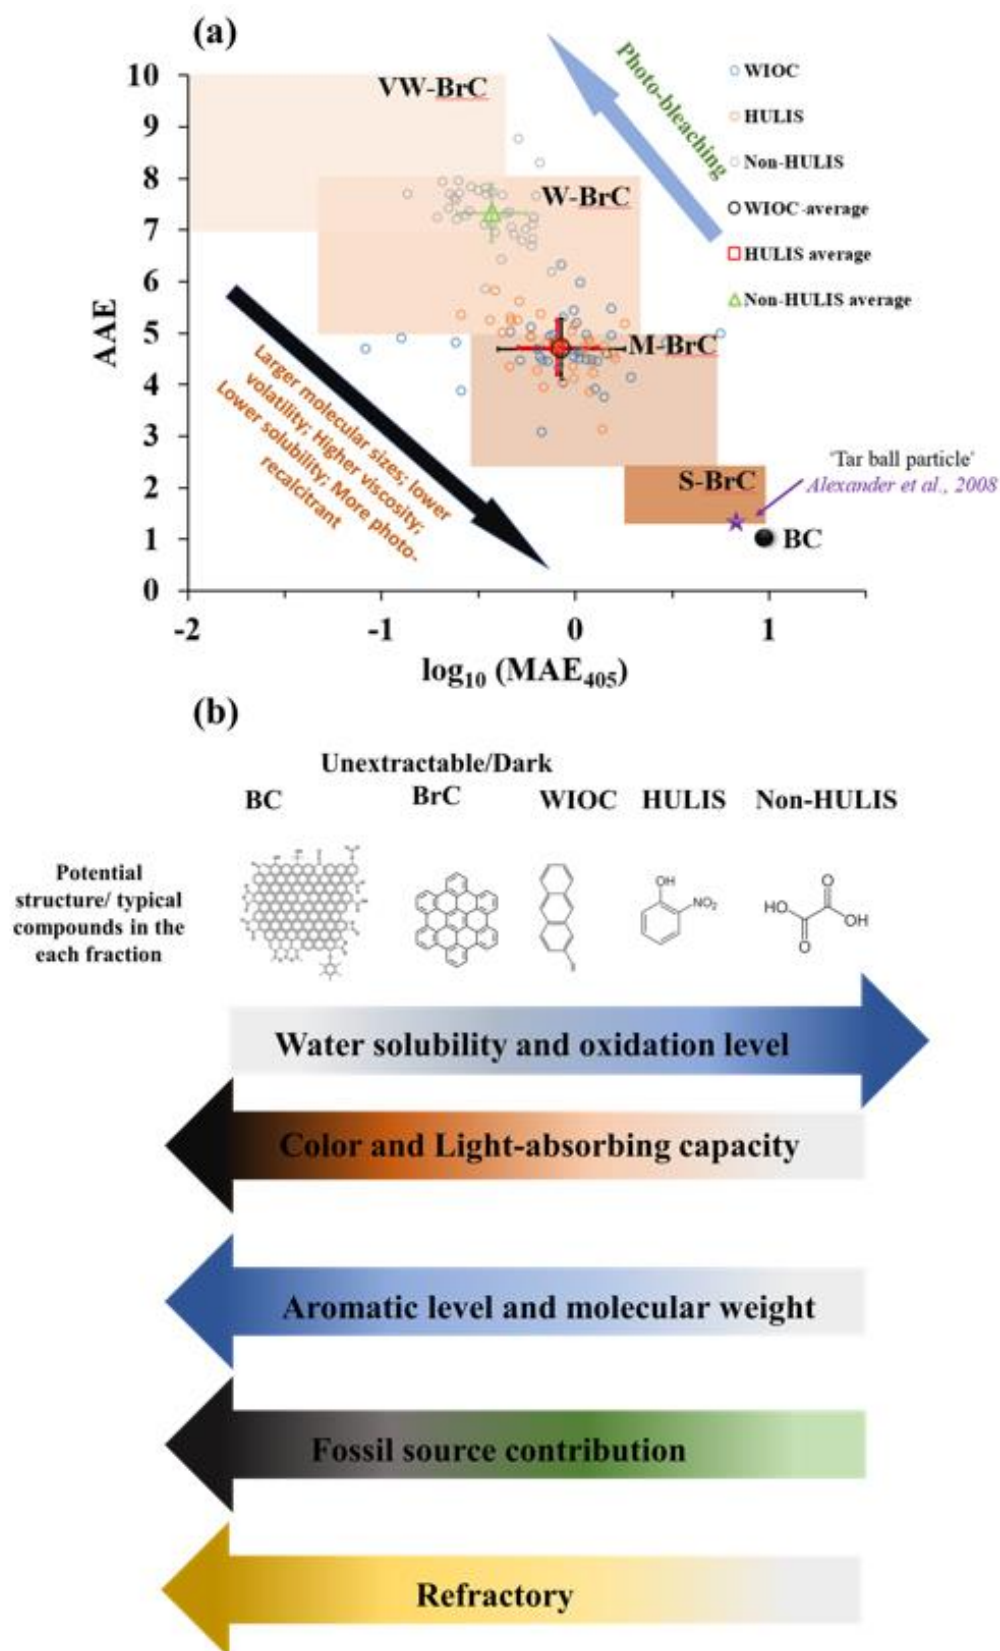

**Figure 6.** (a) The light-absorbing properties of WIOC, HULIS and Non-HULIS mapped in the  $\log_{10}(\text{MAE}_{405 \text{ nm}}) - \text{AAE}$  space following the approach of Saleh (2020). Brown-shaded areas indicate “very weakly (VW)”, “weakly (W)”, “moderately (M)”, and “strongly (S)” light-absorbing BrC classes. The star symbol marks the upper limit of individual “tar ball particles” inferred from the electron energy loss Spectro

515 microscopy (Alexander et al., 2008). The AAE is calculated for the wavelength range 330 to 400 nm in this  
516 study. (b) The continuum of light-absorbing capacity, water solubility, aromaticity, source and refractory of  
517 different carbonaceous components. Arrows indicate the direction of increase. The WIOC in this study does  
518 not strictly denote OC that is insoluble in water, it is more likely to be OC that is insoluble in water but  
519 soluble in methanol.

520

521 In Figure 6b, we proposed a possible light-absorbing continuum of carbonaceous aerosols. The light-  
522 absorbing properties of carbonaceous aerosols are largely dependent on their molecular structure, the  
523 aromatic molecules have been shown to be the most important fractions relevant to the light-absorbing  
524 properties (Andreae and Gelencser, 2006; Bond et al., 2013; Laskin et al., 2015). Generally, the light-  
525 absorbing capacity increased with the aromatic level/fractions. For instance, most of BC and dark-BrC as  
526 the unextractable and strong light-absorbing components, are enriched with carbon-rich aromatic molecules  
527 (Corbin et al., 2019; El Hajj et al., 2021; Saleh, 2020). BC is composed of large polycyclic aromatics with  
528 graphitic-like structures (Pöschl, 2005). According to the chemical and physical properties, BC can be  
529 further subdivided into soot-BC and char-BC (Han et al., 2010; Masiello, 2004). Due to higher the  $sp^2$ -bond  
530 carbon and aromatic level of soot-BC, the light-absorbing capacity of soot-BC is higher than char-BC  
531 (Andreae and Gelencser, 2006; Corbin et al., 2019; Schnaiter et al., 2003). Dark-BrC, also known as tar  
532 balls, is also unextractable light-absorbing carbonaceous component, which exhibits light-absorbing  
533 properties similar to BC. The dark-BrC could be considered as incipient BC, characterized by lower  
534 molecular weight and aromatic levels compared to mature BC (El Hajj et al., 2021; Saleh et al., 2018). For  
535 the extractable hydrophobic OC fraction (e.g., WIOC and HULIS), the aromatic compounds, including  
536 PAHs, nitrophenol, and O-/N-aromatics, are the major light-absorbing components (Laskin et al., 2015).  
537 Notably, both the molecular weight and aromatic level of aromatic compounds in the extractable  
538 hydrophobic OC fraction are commonly lower than those in dark-BrC (Chakrabarty et al., 2023; Corbin et  
539 al., 2019). Thus, both the WIOC and HULIS located in the M-BrC space as shown in the Figure 6a. In this  
540 study, optical parameters ( $E2/E3$  and AAE) do not reveal a significant difference in molecular weight and  
541 aromatic levels between HULIS and WIOC. This discrepancy may be attributed to the limited reliability  
542 and accuracy of these optical parameters in reflecting molecular weight and aromaticity. However,  
543 employing robust analytical technologies, such as ultra-resolution mass spectrometry and benzene-poly-  
544 carboxylic acids tracers (Sun et al., 2021; Tang et al., 2020), studies has demonstrated higher aromatic  
545 fraction and aromaticity for WIOC compared to HULIS (Huang et al., 2020; Sun et al., 2021; Tang et al.,

2020). Particularly, polycyclic aromatics are identified as key fractions determining both the light absorptivity and wavelength dependence of WIOC from biomass burning source samples (Sun et al., 2021). Compared with hydrophobic OC, the hydrophilic OC exhibits much lower molecular weight and aromaticity. This is evidenced by the much lower E2/E3 and AAE values of hydrophobic OC than the hydrophilic OC (Figures 3b and c). Overall, the light-absorbing capacity (or color) of carbonaceous components follows the order: soot-BC > char-BC > dark-BrC > WIOC > HULIS > non-HULIS. The light-absorbing capacity and molecular weight of carbonaceous components increase with their aromaticity, while water solubility/polarity decreases with increasing aromaticity.

The molecular structure of carbonaceous components is highly related to specific sources. The BC as carbonaceous with highest aromatic level, is exclusively emitted from incomplete combustion of BB and fossil fuel (Bond et al., 2013). The content of soot-/char-BC from distinct primary emission sources significantly varies with fuel type and combustion conditions (Cai et al., 2023; Han et al., 2021). Soot-BC, formed in high-temperature combustion conditions and with high aromatic contents in the fuel, is more prevalent in fossil fuel combustion processes (e.g., coal and gasoline) than in BB (Han et al., 2021; El Hajj et al., 2021). Thus, soot-BC is predominantly contributed by fossil fuel combustion, while char-BC is the dominant subgroup in BB (Cai et al., 2023; Han et al., 2010). Remarkably, despite the subgroup distinctions within BC, as the strongest light-absorbing carbonaceous component, over 70% of BC in the ambient aerosols from major city clusters in China is attributed to fossil fuel combustion (Jiang et al., 2020a). Regarding the BrC, in addition to sharing primary emission sources with BC, it can also be formed secondarily through complex chemical reactions (Laskin et al., 2015). Dark-BrC as strongest light-absorbing OC, predominantly derived from incomplete combustion of BB and fossil fuels. Laboratory experiments and field observations consistently show that dark-BrC is more abundant in BB plumes (Chakrabarty et al., 2023; Mathai et al., 2023). However, it is noteworthy that controlled-combustion experiments report fossil fuel-derived dark-BrC may exhibit a stronger light-absorbing capacity than BB-derived dark-BrC (Cheng et al., 2019; Yu et al., 2021). Concerning the WIOC, our PMF-based sources apportionment results cannot distinctly differentiate between fossil and non-fossil sources for WIOC. However, radiocarbon isotope ( $\Delta^{14}\text{C}$ ), a more robust source apportionment method, has demonstrated that, despite variations in sampling locations and seasons, fossil sources are more enriched in WIOC than WSOC in ambient aerosols from South/East Asia and the U.S.A. (Dasari et al., 2019; Kirillova et al., 2014; Wozniak et al., 2012; Kirillova et al., 2013). In the water-soluble fractions, the HULIS as relatively hydrophobic

WSOC, our previous study using radiocarbon isotope ( $\Delta^{14}\text{C}$ ) have shown that the HULIS across ten Chinese cities exhibit a higher fossil contribution than hydrophilic WSOC (e.g., non-HULIS) ( $48.9 \pm 9.0\%$  vs.  $30.3 \pm 13.9\%$ ,  $p < 0.01$ ) (Mo et al., 2024). By correlating the light-absorbing capacity with the variation in the sources of different carbonaceous components, as discussed above, we observe that more strongly absorbing carbonaceous components tend to be more enriched with fossil sources.

582

Upon emission or generation into the atmosphere, the light-absorbing properties of carbonaceous aerosols undergo dynamic changes significantly influenced by atmospheric processes (Dasari et al., 2019; Laskin et al., 2015). The response of different carbonaceous components to atmospheric processes varies extensively. The BC is refractory carbonaceous component in the aerosols, which is recalcitrant to the chemical oxidation. Although laboratory studies reported that the BC is possible oxidized and release water-soluble component under specific conditions (Decesari et al., 2002). But BC is often cored with OC in the ambient aerosols, making somewhat shielded towards oxidants (Bond et al., 2013). Similarly, dark-BrC exhibits considerable resistance to sunlight-driven photochemical bleaching, resulting in the persistence of light-absorbing organic aerosols in the atmosphere (Chakrabarty et al., 2023). This resistance is likely associated with the high viscosity of dark-BrC, limiting surface and bulk reaction rates. Consequently, unextractable light-absorbing components (BC + dark-BrC) not only display strong light absorptivity but also persist longer in the atmosphere. For the WIOC, based on the PMF model results, we found that the WIOC was enriched with primary emissions sources (e.g., coal combustion and BB) than WSOC. This indicated the WIOC is more recalcitrant than WSOC. Indeed, employing dual carbon isotopes ( $\delta^{13}\text{C}$ -  $\Delta^{14}\text{C}$ ), studies found that WIOC is not only enriched with fossil sources, but also exhibit greater persistence and relatively longer lifetimes compared to WSOC components present in ambient aerosols (Kirillova et al., 2014; Kirillova et al., 2013; Wozniak et al., 2012). Similar to WIOC, fossil components in HULIS are more resistant and less susceptible to oxidative photobleaching, contributing to their relatively high light-absorbing capacity compared to non-HULIS components (Mo et al., 2024). Generally, chromophores in the aqueous phase experience rapid photo-bleaching, while those in the viscous organic phase undergo slower rates of photo-degradation (Klodt et al., 2022). The recalcitrant properties of WIOC and HULIS may stem from the tendency of these hydrophobic OC components to partition into the viscous organic phase, potentially rendering them more photo-recalcitrant. By linking the light-absorbing capacity to the refractory of different carbonaceous component as discussed above, the strongly light-absorbing carbonaceous

components tend to be more recalcitrant in the atmospheres (Figure 6b).

It is important to acknowledge that carbonaceous aerosols encompass a wide array of diverse components, exhibiting a continuum of physical and chemical properties. The distinction between these carbonaceous components, as discussed above, is primarily based on conceptual and operational definitions, rather than clear boundaries in reality. In other words, the classification of carbonaceous components in aerosols is highly dependent on operational criteria. In this study, on the one hand, the WIOC, HULIS-C, and non-HULIS-C are well-defined based on their polarity. On the other hand, the definition of BC, which includes char- and soot-BC, is more closely associated with thermal and optical properties. These operational definitions may lead to overlaps between different carbonaceous components. For instance, BB and coal combustion emit large amounts of large molecular weight soluble compounds, such as HULIS (e.g., HULIS), which may char and produce false char EC signals in the TOT analysis (Yu et al., 2002). Additionally, certain portions of char-BC may exhibit chemical and physical behaviors akin to high-molecular-weight OC compounds, thereby overlapping with BrC. Therefore, there is no a clear boundary for the carbonaceous components.

Taken together, we propose a continuum for light-absorbing carbonaceous aerosols, taking into account factors such as aromaticity, molecular weight, sources, polarity and atmospheric processes (Figures 6a and b). The light-absorbing capacity of carbonaceous components exhibit following orders: soot-BC > char-BC > dark-BrC > WIOC > HULIS > non-HULIS. This hierarchy indicates that the light-absorbing capacity of carbonaceous components increases with aromaticity, molecular weight, fossil sources contribution, and refractoriness. Conversely, as the polarity/oxidized level of carbonaceous components increases, their light absorbing-capacity weakens. These findings suggest that fossil fuel combustion tends to generate relatively long-term and strongly light-absorbing carbonaceous components. In contrast, light-absorbing carbonaceous components derived from biomass burning are prone to photo-degradation, transforming into colorless carbon with high polarity and cloud condensation activity.

## 4. Conclusions

In this study, we investigated the light-absorbing properties and sources of WIOC in ten representative

urban cities across China. We found that WIOC averagely accounts for a substantial portion of the concentrations ( $33.4 \pm 7.66\%$ ) and Abs<sub>365</sub> ( $40.5 \pm 9.73\%$ ) of extractable OC (EX-OC). The MAE<sub>365</sub> of WIOC ( $1.59 \pm 0.55 \text{ m}^2/\text{gC}$ ) was comparable to that of HULIS ( $1.54 \pm 0.57 \text{ m}^2/\text{gC}$ ) but significantly higher than non-HULIS ( $0.71 \pm 0.28 \text{ m}^2/\text{gC}$ ), suggesting the stronger light-absorbing capacity of hydrophobic OC (WIOC+HULIS) compared to hydrophilic OC (non-HULIS). The dominant sources of WIOC were biomass burning (31.0%) and coal combustion (31.1%), with coal combustion exhibiting the highest light-absorbing capacity among these sources. Moreover, utilizing the simple forcing efficiency (SFE<sub>300-700nm</sub>) method, we found that WIOC exhibited the highest SFE<sub>300-700nm</sub> ( $6.57 \pm 5.37 \text{ W/g}$ ) among the EX-OC fractions. Notably, the radiative forcing of EX-OC was predominantly attributed to hydrophobic OC (WIOC:  $39.4 \pm 15.5\%$  and HULIS:  $39.5 \pm 12.1\%$ ). Finally, we proposed a light-absorbing carbonaceous continuum based on considerations of aromaticity, sources, and atmospheric processes of different carbonaceous components. This continuum revealed that carbonaceous components more enriched with fossil sources tend to possess stronger light-absorbing capacity, higher aromatic levels, increased molecular weights, and greater recalcitrance in the atmosphere. The implications of our study underscore the necessity of reducing fossil fuel emissions as an effective strategy for mitigating both gaseous (CO<sub>2</sub>) and particulate light-absorbing carbonaceous warming components.

653

## 654 **Author Contributions**

655 **Conceptualization:** Yangzhi Mo

656 **Funding acquisition:** Gan Zhang

657 **Investigation:** Yangzhi Mo, Jiao Tang, Hongxing Jiang, Zhineng Cheng, Sanyuan Zhu

658 **Methodology:** Yangzhi Mo

659 **Project Administration:** Gan Zhang, Shizhen Zhao

660 **Resources:** Sanyuan Zhu, Yingjun Chen, Chongguo Tian, Zhineng Cheng, Gan Zhang

661 **Software:** Yangzhi Mo

662 **Supervision:** Guangcai Zhong, Jun Li, Gan Zhang

663 **Validation:** Yangzhi Mo, Jun Li

664 **Writing – original draft:** Yangzhi Mo

665 **Writing – review & editing:** Yangzhi Mo, Jun Li, Gan Zhang

666 **Competing interests**

667 The contact author has declared that none of the authors has any competing interests  
668  
669  
670

## 671 **Acknowledgements**

672 This study was supported by the Natural Science Foundation of China (NSFC; No. 42030715, 42192511,  
673 and 42107121), the Alliance of International Science Organizations (Grant No. ANSO-CR-KP-2021-05),  
674 the Guangdong Basic and Applied Basic Research Foundation (2021A0505020017, 2023A1515012359  
675 and 2023B1515020067), and a scholarship for Yangzhi Mo provided by the China Scholarship Council  
676 (202204910172). The authors gratefully thank the people at all sites for sample collections and all of the  
677 individuals and groups participating in this project.  
678

## 679 **References**

- 680 Alexander, D. T. L., Crozier, P. A., and Anderson, J. R.: Brown Carbon Spheres in East Asian Outflow and  
681 Their Optical Properties, *Science*, 321, 833-836, <https://doi:10.1126/science.1155296>, 2008.
- 682 Andreae, M. O. and Gelencser, A.: Black carbon or brown carbon? The nature of light-absorbing  
683 carbonaceous aerosols, *Atmospheric Chemistry and Physics*, 6, 3131-3148, [https://10.5194/acp-6-3131-](https://10.5194/acp-6-3131-2006)  
684 [2006](https://10.5194/acp-6-3131-2006), 2006.
- 685 Arola, A., Schuster, G., Myhre, G., Kazadzis, S., Dey, S., and Tripathi, S. N.: Inferring absorbing organic  
686 carbon content from AERONET data, *Atmospheric Chemistry and Physics*, 11, 215-225,  
687 <https://10.5194/acp-11-215-2011>, 2011.
- 688 Baduel, C., Voisin, D., and Jaffrezo, J. L.: Seasonal variations of concentrations and optical properties of  
689 water soluble HULIS collected in urban environments, *Atmospheric Chemistry and Physics*, 10, 4085-4095,  
690 <https://10.5194/acp-10-4085-2010>, 2010.
- 691 Bahadur, R., Praveen, P. S., Xu, Y. Y., and Ramanathan, V.: Solar absorption by elemental and brown carbon  
692 determined from spectral observations, *Proceedings of the National Academy of Sciences of the United*  
693 *States of America*, 109, 17366-17371, <https://10.1073/pnas.1205910109>, 2012.
- 694 Bond, T. C.: Spectral dependence of visible light absorption by carbonaceous particles emitted from coal  
695 combustion, *Geophysical Research Letters*, 28, 4075-4078, <https://10.1029/2001gl013652>, 2001.
- 696 Bond, T. C. and Bergstrom, R. W.: Light absorption by carbonaceous particles: An investigative review,  
697 *Aerosol Science and Technology*, 40, 27-67, <https://10.1080/02786820500421521>, 2006.

698 Bond, T. C., Doherty, S. J., Fahey, D. W., Forster, P. M., Berntsen, T., DeAngelo, B. J., Flanner, M. G.,  
699 Ghan, S., Kärcher, B., Koch, D., Kinne, S., Kondo, Y., Quinn, P. K., Sarofim, M. C., Schultz, M. G., Schulz,  
700 M., Venkataraman, C., Zhang, H., Zhang, S., Bellouin, N., Guttikunda, S. K., Hopke, P. K., Jacobson, M.  
701 Z., Kaiser, J. W., Klimont, Z., Lohmann, U., Schwarz, J. P., Shindell, D., Storelvmo, T., Warren, S. G., and  
702 Zender, C. S.: Bounding the role of black carbon in the climate system: A scientific assessment, *Journal of*  
703 *Geophysical Research-Atmospheres*, 118, 5380-5552, <https://10.1002/jgrd.50171>, 2013.

704 Bosch, C., Andersson, A., Kirillova, E. N., Budhavant, K., Tiwari, S., Praveen, P. S., Russell, L. M., Beres,  
705 N. D., Ramanathan, V., and Gustafsson, O.: Source-diagnostic dual-isotope composition and optical  
706 properties of water-soluble organic carbon and elemental carbon in the South Asian outflow intercepted  
707 over the Indian Ocean, *Journal of Geophysical Research-Atmospheres*, 119, 11743-11759,  
708 <https://10.1002/2014jd022127>, 2014.

709 Cai, J., Jiang, H., Chen, Y., Liu, Z., Han, Y., Shen, H., Song, J., Li, J., Zhang, Y., Wang, R., Chen, J., and  
710 Zhang, G.: Char dominates black carbon aerosol emission and its historic reduction in China, *Nature*  
711 *Communications*, 14, 6444, <https://10.1038/s41467-023-42192-8>, 2023.

712 Chakrabarty, R. K., Shetty, N. J., Thind, A. S., Beeler, P., Sumlin, B. J., Zhang, C. C., Liu, P., Idrobo, J. C.,  
713 Adachi, K., Wagner, N. L., Schwarz, J. P., Ahern, A., Sedlacek, A. J., Lambe, A., Daube, C., Lyu, M., Liu,  
714 C., Herndon, S., Onasch, T. B., and Mishra, R.: Shortwave absorption by wildfire smoke dominated by dark  
715 brown carbon, *Nature Geoscience*, 16, <https://10.1038/s41561-023-01237-9>, 2023.

716 Chen, Q., Ikemori, F., Nakamura, Y., Vodicka, P., Kawamura, K., and Mochida, M.: Structural and Light-  
717 Absorption Characteristics of Complex Water-Insoluble Organic Mixtures in Urban Submicrometer  
718 Aerosols, *Environ. Sci. Technol.*, 51, 8293-8303, <https://10.1021/acs.est.7b01630>, 2017.

719 Chen, Q. C., Ikemori, F., and Mochida, M.: Light Absorption and Excitation-Emission Fluorescence of  
720 Urban Organic Aerosol Components and Their Relationship to Chemical Structure, *Environmental Science*  
721 *& Technology*, 50, 10859-10868, <https://10.1021/acs.est.6b02541>, 2016.

722 Chen, Y. and Bond, T. C.: Light absorption by organic carbon from wood combustion, *Atmos. Chem. Phys.*,  
723 10, 1773-1787, <https://10.5194/acp-10-1773-2010>, 2010.

724 Cheng, Y., He, K.-b., Du, Z.-y., Engling, G., Liu, J.-m., Ma, Y.-l., Zheng, M., and Weber, R. J.: The  
725 characteristics of brown carbon aerosol during winter in Beijing, *Atmos. Environ.*, 127, 355-364,  
726 <https://10.1016/j.atmosenv.2015.12.035>, 2016.

727 Cheng, Z. Z., Atwi, K., Onyima, T., and Saleh, R.: Investigating the dependence of light-absorption  
728 properties of combustion carbonaceous aerosols on combustion conditions, *Aerosol Science and*

Technology, 53, 419-434, <https://10.1080/02786826.2019.1566593>, 2019.

Choudhary, V., Rajput, P., and Gupta, T.: Absorption properties and forcing efficiency of light-absorbing water-soluble organic aerosols: Seasonal and spatial variability, *Environmental Pollution*, 272, <https://10.1016/j.envpol.2020.115932>, 2021.

Chylek, P. and Wong, J.: EFFECT OF ABSORBING AEROSOLS ON GLOBAL RADIATION BUDGET, *Geophysical Research Letters*, 22, 929-931, <https://10.1029/95gl00800>, 1995.

Coppola, A. I., Wagner, S., Lennartz, S. T., Seidel, M., Ward, N. D., Dittmar, T., Santín, C., and Jones, M. W.: The black carbon cycle and its role in the Earth system, *Nature Reviews Earth & Environment*, 3, 516-532, <https://10.1038/s43017-022-00316-6>, 2022.

Corbin, J. C., Czech, H., Massabò, D., de Mongeot, F. B., Jakobi, G., Liu, F., Lobo, P., Mennucci, C., Mensah, A. A., Orasche, J., Pieber, S. M., Prévôt, A. S. H., Stengel, B., Tay, L. L., Zanatta, M., Zimmermann, R., El Haddad, I., and Gysel, M.: Infrared-absorbing carbonaceous tar can dominate light absorption by marine-engine exhaust, *Npj Climate and Atmospheric Science*, 2, <https://10.1038/s41612-019-0069-5>, 2019.

Dasari, S., Andersson, A., Bikkina, S., Holmstrand, H., Budhavant, K., Satheesh, S., Asmi, E., Kesti, J., Backman, J., Salam, A., Bisht, D. S., Tiwari, S., Hameed, Z., and Gustafsson, O.: Photochemical degradation affects the light absorption of water-soluble brown carbon in the South Asian outflow, *Science Advances*, 5, <https://10.1126/sciadv.aau8066>, 2019.

Decesari, S., Facchini, M. C., Matta, E., Mircea, M., Fuzzi, S., Chughtai, A. R., and Smith, D. M.: Water soluble organic compounds formed by oxidation of soot, *Atmospheric Environment*, 36, 1827-1832, [https://10.1016/s1352-2310\(02\)00141-3](https://10.1016/s1352-2310(02)00141-3), 2002.

Deng, J., Ma, H., Wang, X., Zhong, S., Zhang, Z., Zhu, J., Fan, Y., Hu, W., Wu, L., Li, X., Ren, L., Pavuluri, C. M., Pan, X., Sun, Y., Wang, Z., Kawamura, K., and Fu, P.: Measurement report: Optical properties and sources of water-soluble brown carbon in Tianjin, North China – insights from organic molecular compositions, *Atmos. Chem. Phys.*, 22, 6449-6470, <https://10.5194/acp-22-6449-2022>, 2022.

Du, Z. Y., He, K. B., Cheng, Y., Duan, F. K., Ma, Y. L., Liu, J. M., Zhang, X. L., Zheng, M., and Weber, R.: A yearlong study of water-soluble organic carbon in Beijing II: Light absorption properties, *Atmospheric Environment*, 89, 235-241, <https://10.1016/j.atmosenv.2014.02.022>, 2014.

Duarte, R., Pio, C. A., and Duarte, A. C.: Spectroscopic study of the water-soluble organic matter isolated from atmospheric aerosols collected under different atmospheric conditions, *Analytica Chimica Acta*, 530, 7-14, <https://10.1016/j.aca.2004.08.049>, 2005.

760 El Hajj, O., Atwi, K., Cheng, Z., Koritzke, A. L., Christianson, M. G., Dewey, N. S., Rotavera, B., and  
 761 Saleh, R.: Two-stage aerosol formation in low-temperature combustion, *Fuel*, 304,  
 762 <https://10.1016/j.fuel.2021.121322>, 2021.

763 Fan, X., Song, J., and Peng, P. a.: Comparison of isolation and quantification methods to measure humic-  
 764 like substances (HULIS) in atmospheric particles, *Atmospheric Environment*, 60, 366-374,  
 765 <https://10.1016/j.atmosenv.2012.06.063>, 2012.

766 Fan, X., Wei, S., Zhu, M., Song, J., and Peng, P. a.: Comprehensive characterization of humic-like  
 767 substances in smoke PM<sub>2.5</sub> emitted from the combustion of biomass materials and fossil fuels,  
 768 *Atmospheric Chemistry and Physics*, 16, 13321-13340, <https://10.5194/acp-16-13321-2016>, 2016.

769 Fellman, J. B., Hood, E., Raymond, P. A., Stubbins, A., and Spencer, R. G. M.: Spatial Variation in the  
 770 Origin of Dissolved Organic Carbon in Snow on the Juneau Icefield, Southeast Alaska, *Environmental*  
 771 *Science & Technology*, 49, 11492-11499, <https://10.1021/acs.est.5b02685>, 2015.

772 Feng, Y., Ramanathan, V., and Kotamarthi, V. R.: Brown carbon: a significant atmospheric absorber of solar  
 773 radiation?, *Atmospheric Chemistry and Physics*, 13, 8607-8621, <https://10.5194/acp-13-8607-2013>, 2013.

774 Filonchyk, M., Peterson, M. P., Zhang, L., and Yan, H.: An analysis of air pollution associated with the  
 775 2023 sand and dust storms over China: Aerosol properties and PM<sub>10</sub> variability, *Geoscience Frontiers*, 15,  
 776 101762, <https://doi.org/10.1016/j.gsf.2023.101762>, 2024.

777 Han, L. H., Zhuang, G. S., Cheng, S. Y., Wang, Y., and Li, J.: Characteristics of re-suspended road dust and  
 778 its impact on the atmospheric environment in Beijing, *Atmospheric Environment*, 41, 7485-7499,  
 779 <https://10.1016/j.atmosenv.2007.05.044>, 2007.

780 Han, Y., Chen, Y. J., Feng, Y. L., Shang, Y., Li, J., Li, Q., and Chen, J. M.: Fuel Aromaticity Promotes Low-  
 781 Temperature Nucleation Processes of Elemental Carbon from Biomass and Coal Combustion,  
 782 *Environmental Science & Technology*, 55, 2532-2540, <https://10.1021/acs.est.0c06694>, 2021.

783 Han, Y. M., Cao, J. J., Lee, S. C., Ho, K. F., and An, Z. S.: Different characteristics of char and soot in the  
 784 atmosphere and their ratio as an indicator for source identification in Xi'an, China, *Atmos. Chem. Phys.*,  
 785 10, 595-607, <https://10.5194/acp-10-595-2010>, 2010.

786 Hecobian, A., Zhang, X., Zheng, M., Frank, N., Edgerton, E. S., and Weber, R. J.: Water-Soluble Organic  
 787 Aerosol material and the light-absorption characteristics of aqueous extracts measured over the  
 788 Southeastern United States, *Atmospheric Chemistry and Physics*, 10, 5965-5977, [https://10.5194/acp-10-](https://10.5194/acp-10-5965-2010)  
 789 [5965-2010](https://10.5194/acp-10-5965-2010), 2010.

790 Huang, R.-J., Yang, L., Shen, J., Yuan, W., Gong, Y., Guo, J., Cao, W., Duan, J., Ni, H., Zhu, C., Dai, W.,

791 Li, Y., Chen, Y., Chen, Q., Wu, Y., Zhang, R., Dusek, U., O'Dowd, C., and Hoffmann, T.: Water-Insoluble  
 792 Organics Dominate Brown Carbon in Wintertime Urban Aerosol of China: Chemical Characteristics and  
 793 Optical Properties, *Environmental Science & Technology*, 54, 7836-7847, <https://10.1021/acs.est.0c01149>,  
 794 2020.

795 Jiang, F., Liu, J. W., Huang, Z. J., Zheng, J. Y., and Zhang, G.: Progress of the stable carbon and radiocarbon  
 796 isotopes of black carbon aerosol, *Chinese Science Bulletin-Chinese*, 65, 4095-4106, [https://10.1360/tb-](https://10.1360/tb-2020-0355)  
 797 [2020-0355](https://10.1360/tb-2020-0355), 2020a.

798 Jiang, H. X., Li, J., Chen, D. H., Tang, J., Cheng, Z. N., Mo, Y. Z., Su, T., Tian, C. G., Jiang, B., Liao, Y.  
 799 H., and Zhang, G.: Biomass burning organic aerosols significantly influence the light absorption properties  
 800 of polarity-dependent organic compounds in the Pearl River Delta Region, China, *Environment*  
 801 *International*, 144, <https://10.1016/j.envint.2020.106079>, 2020b.

802 Jimenez, J. L., Canagaratna, M. R., Donahue, N. M., Prevot, A. S. H., Zhang, Q., Kroll, J. H., DeCarlo, P.  
 803 F., Allan, J. D., Coe, H., Ng, N. L., Aiken, A. C., Docherty, K. S., Ulbrich, I. M., Grieshop, A. P., Robinson,  
 804 A. L., Duplissy, J., Smith, J. D., Wilson, K. R., Lanz, V. A., Hueglin, C., Sun, Y. L., Tian, J., Laaksonen, A.,  
 805 Raatikainen, T., Rautiainen, J., Vaattovaara, P., Ehn, M., Kulmala, M., Tomlinson, J. M., Collins, D. R.,  
 806 Cubison, M. J., Dunlea, E. J., Huffman, J. A., Onasch, T. B., Alfarra, M. R., Williams, P. I., Bower, K.,  
 807 Kondo, Y., Schneider, J., Drewnick, F., Borrmann, S., Weimer, S., Demerjian, K., Salcedo, D., Cottrell, L.,  
 808 Griffin, R., Takami, A., Miyoshi, T., Hatakeyama, S., Shimono, A., Sun, J. Y., Zhang, Y. M., Dzepina, K.,  
 809 Kimmel, J. R., Sueper, D., Jayne, J. T., Herndon, S. C., Trimborn, A. M., Williams, L. R., Wood, E. C.,  
 810 Middlebrook, A. M., Kolb, C. E., Baltensperger, U., and Worsnop, D. R.: Evolution of Organic Aerosols in  
 811 the Atmosphere, *Science*, 326, 1525-1529, <https://10.1126/science.1180353>, 2009.

812 Kalberer, M., Sax, M., and Samburova, V.: Molecular size evolution of oligomers in organic aerosols  
 813 collected in urban atmospheres and generated in a smog chamber, *Environmental Science & Technology*,  
 814 40, 5917-5922, <https://10.1021/es0525760>, 2006.

815 Kirchstetter, T. W., Novakov, T., and Hobbs, P. V.: Evidence that the spectral dependence of light absorption  
 816 by aerosols is affected by organic carbon, *Journal of Geophysical Research-Atmospheres*, 109,  
 817 <https://10.1029/2004jd004999>, 2004.

818 Kirillova, E. N., Andersson, A., Han, J., Lee, M., and Gustafsson, O.: Sources and light absorption of water-  
 819 soluble organic carbon aerosols in the outflow from northern China, *Atmospheric Chemistry and Physics*,  
 820 14, 1413-1422, <https://10.5194/acp-14-1413-2014>, 2014.

821 Kirillova, E. N., Andersson, A., Sheesley, R. J., Kruså, M., Praveen, P. S., Budhavant, K., Safai, P. D., Rao,

822 P. S. P., and Gustafsson, Ö.:  $^{13}\text{C}$ - and  $^{14}\text{C}$ -based study of sources and atmospheric processing of water-  
823 soluble organic carbon (WSOC) in South Asian aerosols:  $^{13}\text{C}$  AND  $^{14}\text{C}$  IN WSOC OF S ASIAN  
824 AEROSOLS, *Journal of Geophysical Research: Atmospheres*, 118, 614-626, <https://10.1002/jgrd.50130>,  
825 2013.

826 Kiss, G., Varga, B., Galambos, I., and Ganszky, I.: Characterization of water-soluble organic matter isolated  
827 from atmospheric fine aerosol, *Journal of Geophysical Research-Atmospheres*, 107,  
828 <https://10.1029/2001jd000603>, 2002.

829 Klodt, A. L., Adamek, M., Dibley, M., Nizkorodov, S. A., and O'Brien, R. E.: Effects of the sample matrix  
830 on the photobleaching and photodegradation of toluene-derived secondary organic aerosol compounds,  
831 *Atmospheric Chemistry and Physics*, 22, 10155-10171, <https://10.5194/acp-22-10155-2022>, 2022.

832 Laskin, A., Laskin, J., and Nizkorodov, S. A.: Chemistry of Atmospheric Brown Carbon, *Chemical Reviews*,  
833 115, 4335-4382, <https://10.1021/cr5006167>, 2015.

834 Li, X. F., Yu, F., Song, Y. Y., Zhang, C., Yan, F. P., Hu, Z. F., Lei, Y. L., Tripathee, L., Zhang, R., Guo, J. N.,  
835 Wang, Y. Q., Chen, Q. C., Liu, L., Cao, J. J., and Wang, Q. Y.: Water-soluble brown carbon in PM<sub>2.5</sub> at two  
836 typical sites in Guanzhong Basin: Optical properties, sources, and implications, *Atmospheric Research*, 281,  
837 <https://10.1016/j.atmosres.2022.106499>, 2023.

838 Li, X. H., Xiao, M. D., Xu, X. Z., Zhou, J. C., Yang, K. Q., Wang, Z. H., Zhang, W. J., Hopke, P. K., and  
839 Zhao, W. X.: Light Absorption Properties of Organic Aerosol from Wood Pyrolysis: Measurement Method  
840 Comparison and Radiative Implications, *Environmental Science & Technology*, 54, 7156-7164,  
841 <https://10.1021/acs.est.0c01475>, 2020.

842 Lin, P., Engling, G., and Yu, J. Z.: Humic-like substances in fresh emissions of rice straw burning and in  
843 ambient aerosols in the Pearl River Delta Region, China, *Atmospheric Chemistry and Physics*, 10, 6487-  
844 6500, <https://10.5194/acp-10-6487-2010>, 2010a.

845 Lin, P., Huang, X.-F., He, L.-Y., and Yu, J. Z.: Abundance and size distribution of HULIS in ambient  
846 aerosols at a rural site in South China, *J. Aerosol Sci.*, 41, 74-87, <https://10.1016/j.jaerosci.2009.09.001>,  
847 2010b.

848 Lin, P., Fleming, L. T., Nizkorodov, S. A., Laskin, J., and Laskin, A.: Comprehensive Molecular  
849 Characterization of Atmospheric Brown Carbon by High Resolution Mass Spectrometry with Electrospray  
850 and Atmospheric Pressure Photoionization, *Analytical Chemistry*, 90, 12493-12502,  
851 <https://10.1021/acs.analchem.8b02177>, 2018.

852 Liu, J., Bergin, M., Guo, H., King, L., Kotra, N., Edgerton, E., and Weber, R. J.: Size-resolved

853 measurements of brown carbon in water and methanol extracts and estimates of their contribution to  
 854 ambient fine-particle light absorption, *Atmospheric Chemistry and Physics*, 13, 12389-12404,  
 855 <https://10.5194/acp-13-12389-2013>, 2013.

856 Masiello, C. A.: New directions in black carbon organic geochemistry, *Marine Chemistry*, 92, 201-213,  
 857 <https://10.1016/j.marchem.2004.06.043>, 2004.

858 Mathai, S., Veghte, D., Kovarik, L., Mazzoleni, C., Tseng, K. P., Bucci, S., Capek, T., Cheng, Z. Z.,  
 859 Marinoni, A., and China, S.: Optical Properties of Individual Tar Balls in the Free Troposphere,  
 860 *Environmental Science & Technology*, 57, 16834-16842, <https://10.1021/acs.est.3c03498>, 2023.

861 Mo, Y., Li, J., Cheng, Z., Zhong, G., Zhu, S., Tian, C., Chen, Y., and Zhang, G.: Dual Carbon Isotope-Based  
 862 Source Apportionment and Light Absorption Properties of Water-Soluble Organic Carbon in PM<sub>2.5</sub> Over  
 863 China, *Journal of Geophysical Research-Atmospheres*, 126, <https://10.1029/2020jd033920>, 2021.

864 Mo, Y., Li, J., Liu, J., Zhong, G., Cheng, Z., Tian, C., Chen, Y., and Zhang, G.: The influence of solvent and  
 865 pH on determination of the light absorption properties of water-soluble brown carbon, *Atmospheric*  
 866 *Environment*, 161, 90-98, <https://10.1016/j.atmosenv.2017.04.037>, 2017.

867 Mo, Y., Li, J., Zhong, G., Zhu, S., Cheng, Z., Tang, J., Jiang, H., Jiang, B., Liao, Y., Song, J., Tian, C., Chen,  
 868 Y., Zhao, S., and Zhang, G.: The sources and atmospheric processes of strong light-absorbing components  
 869 in water soluble brown carbon: Insights from a multi-proxy study of PM<sub>2.5</sub> in 10 Chinese cities, *Journal of*  
 870 *Geophysical Research: Atmospheres*, 129, <https://doi.org/10.1029/2023JD039512>, 2024.

871 Paterson, K. G.: Analysis of air quality data using positive matrix factorization (vol 33, pg 635, 1999),  
 872 *Environmental Science & Technology*, 33, 3283-3283, <https://10.1021/es992017r>, 1999.

873 Peuravuori, J. and Pihlaja, K.: Molecular size distribution and spectroscopic properties of aquatic humic  
 874 substances, *Analytica Chimica Acta*, 337, 133-149, [https://10.1016/s0003-2670\(96\)00412-6](https://10.1016/s0003-2670(96)00412-6), 1997.

875 Phillips, S. M., Bellcross, A. D., and Smith, G. D.: Light Absorption by Brown Carbon in the Southeastern  
 876 United States is pH-dependent, *Environmental Science & Technology*, 51, 6782-6790,  
 877 <https://10.1021/acs.est.7b01116>, 2017.

878 Pöschl, U.: Atmospheric aerosols:: Composition, transformation, climate and health effects, *Angewandte*  
 879 *Chemie-International Edition*, 44, 7520-7540, <https://10.1002/anie.200501122>, 2005.

880 Saleh, R.: From Measurements to Models: Toward Accurate Representation of Brown Carbon in Climate  
 881 Calculations, *Current Pollution Reports*, 6, 90-104, <https://10.1007/s40726-020-00139-3>, 2020.

882 Saleh, R., Cheng, Z., and Atwi, K.: The Brown-Black Continuum of Light-Absorbing Combustion Aerosols,  
 883 *Environmental Science & Technology Letters*, 5, 508-513, <https://10.1021/acs.estlett.8b00305>, 2018.

884 Saleh, R., Marks, M., Heo, J., Adams, P. J., Donahue, N. M., and Robinson, A. L.: Contribution of brown  
885 carbon and lensing to the direct radiative effect of carbonaceous aerosols from biomass and biofuel burning  
886 emissions, *Journal of Geophysical Research-Atmospheres*, 120, 10285-10296,  
887 <https://10.1002/2015jd023697>, 2015.

888 Saleh, R., Hennigan, C. J., McMeeking, G. R., Chuang, W. K., Robinson, E. S., Coe, H., Donahue, N. M.,  
889 and Robinson, A. L.: Absorptivity of brown carbon in fresh and photo-chemically aged biomass-burning  
890 emissions, *Atmospheric Chemistry and Physics*, 13, 7683-7693, <https://10.5194/acp-13-7683-2013>, 2013.

891 Samburova, V., Didenko, T., Kunenkov, E., Emmenegger, C., Zenobi, R., and Kalberer, M.: Functional  
892 group analysis of high-molecular weight compounds in the water-soluble fraction of organic aerosols,  
893 *Atmospheric Environment*, 41, 4703-4710, <https://10.1016/j.atmosenv.2007.03.033>, 2007.

894 Schnaiter, M., Horvath, H., Möhler, O., Naumann, K. H., Saathoff, H., and Schöck, O. W.: UV-VIS-NIR  
895 spectral optical properties of soot and soot-containing aerosols, *Journal of Aerosol Science*, 34, 1421-1444,  
896 [https://10.1016/s0021-8502\(03\)00361-6](https://10.1016/s0021-8502(03)00361-6), 2003.

897 Song, J., Li, M., Fan, X., Zou, C., Zhu, M., Jiang, B., Yu, Z., Jia, W., Liao, Y., and Peng, P. a.: Molecular  
898 Characterization of Water- and Methanol-Soluble Organic Compounds Emitted from Residential Coal  
899 Combustion Using Ultrahigh-Resolution Electrospray Ionization Fourier Transform Ion Cyclotron  
900 Resonance Mass Spectrometry, *Environmental Science & Technology*, 53, 13607-13617,  
901 <https://10.1021/acs.est.9b04331>, 2019.

902 Sun, H. L., Biedermann, L., and Bond, T. C.: Color of brown carbon: A model for ultraviolet and visible  
903 light absorption by organic carbon aerosol, *Geophysical Research Letters*, 34,  
904 <https://10.1029/2007gl029797>, 2007.

905 Sun, Y., Tang, J., Mo, Y., Geng, X., Zhong, G., Yi, X., Yan, C., Li, J., and Zhang, G.: Polycyclic Aromatic  
906 Carbon: A Key Fraction Determining the Light Absorption Properties of Methanol-Soluble Brown Carbon  
907 of Open Biomass Burning Aerosols, *Environmental Science & Technology*, 55, 15724-15733,  
908 <https://10.1021/acs.est.1c06460>, 2021.

909 Tang, J., Li, J., Su, T., Han, Y., Mo, Y., Jiang, H., Cui, M., Jiang, B., Chen, Y., Tang, J., Song, J., Peng, P. a.,  
910 and Zhang, G.: Molecular compositions and optical properties of dissolved brown carbon in biomass  
911 burning, coal combustion, and vehicle emission aerosols illuminated by excitation-emission matrix  
912 spectroscopy and Fourier transform ion cyclotron resonance mass spectrometry analysis, *Atmospheric  
913 Chemistry and Physics*, 20, 2513-2532, <https://10.5194/acp-20-2513-2020>, 2020.

914 Tian, J., Wang, Q. Y., Ma, Y. Y., Wang, J., Han, Y. M., and Cao, J. J.: Impacts of biomass burning and

photochemical processing on the lightabsorption of brown carbon in the southeastern Tibetan Plateau, Atmospheric Chemistry and Physics, 23, 1879-1892, <https://10.5194/acp-23-1879-2023>, 2023.

Verma, V., Rico-Martinez, R., Kotra, N., King, L., Liu, J. M., Snell, T. W., and Weber, R. J.: Contribution of Water-Soluble and Insoluble Components and Their Hydrophobic/Hydrophilic Subfractions to the Reactive Oxygen Species-Generating Potential of Fine Ambient Aerosols, Environmental Science & Technology, 46, 11384-11392, <https://10.1021/es302484r>, 2012.

Wang, D. W., Yang, X. T., Lu, H. W., Li, D., Xu, H. M., Luo, Y., Sun, J., Ho, S. S. H., and Shen, Z. X.: Oxidative potential of atmospheric brown carbon in six Chinese megacities: Seasonal variation and source apportionment, Atmospheric Environment, 309, <https://10.1016/j.atmosenv.2023.119909>, 2023.

Wang, Y. Q., Wang, M. M., Li, S. P., Sun, H. Y., Mu, Z., Zhang, L. X., Li, Y. G., and Chen, Q. C.: Study on the oxidation potential of the water-soluble components of ambient PM<sub>2.5</sub> over Xi'an, China: Pollution levels, source apportionment and transport pathways, Environment International, 136, <https://10.1016/j.envint.2020.105515>, 2020.

Wong, J. P. S., Nenes, A., and Weber, R. J.: Changes in Light Absorptivity of Molecular Weight Separated Brown Carbon Due to Photolytic Aging, Environmental Science & Technology, 51, 8414-8421, <https://10.1021/acs.est.7b01739>, 2017.

Wozniak, A. S., Willoughby, A. S., Gurganus, S. C., and Hatcher, P. G.: Distinguishing molecular characteristics of aerosol water soluble organic matter from the 2011 trans-North Atlantic US GEOTRACES cruise, Atmospheric Chemistry and Physics, 14, 8419-8434, <https://10.5194/acp-14-8419-2014>, 2014.

Wozniak, A. S., Bauer, J. E., Dickhut, R. M., Xu, L., and McNichol, A. P.: Isotopic characterization of aerosol organic carbon components over the eastern United States, Journal of Geophysical Research-Atmospheres, 117, <https://10.1029/2011jd017153>, 2012.

Xie, M., Chen, X., Hays, M. D., Lewandowski, M., Offenberg, J., Kleindienst, T. E., and Holder, A. L.: Light Absorption of Secondary Organic Aerosol: Composition and Contribution of Nitroaromatic Compounds, Environmental Science & Technology, 51, 11607-11616, <https://10.1021/acs.est.7b03263>, 2017.

Yan, C., Zheng, M., Bosch, C., Andersson, A., Desyaterik, Y., Sullivan, A. P., Collett, J. L., Zhao, B., Wang, S., He, K., and Gustafsson, O.: Important fossil source contribution to brown carbon in Beijing during winter, Scientific Reports, 7, <https://10.1038/srep43182>, 2017.

Yu, J. Z., Xu, J., and Yang, H.: Charring Characteristics of Atmospheric Organic Particulate Matter in

946 Thermal Analysis, *Environmental Science & Technology*, 36, 754-761, <https://10.1021/es015540q>, 2002.

947 Yu, Z. H., Cheng, Z. Z., Magoon, G. R., El Hajj, O., and Saleh, R.: Characterization of light-absorbing

948 aerosols from a laboratory combustion source with two different photoacoustic techniques, *Aerosol Science*

949 *and Technology*, 55, 387-397, <https://10.1080/02786826.2020.1849537>, 2021.

950 Zhang, Q., Shen, Z., Zhang, L., Zeng, Y., Ning, Z., Zhang, T., Lei, Y., Wang, Q., Li, G., Sun, J., Westerdahl,

951 D., Xu, H., and Cao, J.: Investigation of Primary and Secondary Particulate Brown Carbon in Two Chinese

952 Cities of Xi'an and Hong Kong in Wintertime, *Environmental Science & Technology*, 54, 3803-3813,

953 <https://10.1021/acs.est.9b05332>, 2020a.

954 Zhang, Q., Jimenez, J. L., Canagaratna, M. R., Allan, J. D., Coe, H., Ulbrich, I., Alfarra, M. R., Takami, A.,

955 Middlebrook, A. M., Sun, Y. L., Dzepina, K., Dunlea, E., Docherty, K., DeCarlo, P. F., Salcedo, D., Onasch,

956 T., Jayne, J. T., Miyoshi, T., Shimo, A., Hatakeyama, S., Takegawa, N., Kondo, Y., Schneider, J.,

957 Drewnick, F., Borrmann, S., Weimer, S., Demerjian, K., Williams, P., Bower, K., Bahreini, R., Cottrell, L.,

958 Griffin, R. J., Rautiainen, J., Sun, J. Y., Zhang, Y. M., and Worsnop, D. R.: Ubiquity and dominance of

959 oxygenated species in organic aerosols in anthropogenically-influenced Northern Hemisphere midlatitudes,

960 *Geophysical Research Letters*, 34, <https://10.1029/2007gl029979>, 2007.

961 Zhang, T., Shen, Z. X., Zhang, L. M., Tang, Z. Y., Zhang, Q., Chen, Q. C., Lei, Y. L., Zeng, Y. L., Xu, H.

962 M., and Cao, J. J.: PM<sub>2.5</sub> Humic-like substances over Xi'an, China: Optical properties,

963 chemical functional group, and source identification, *Atmospheric Research*, 234,

964 <https://10.1016/j.atmosres.2019.104784>, 2020b.

965 Zhang, X. L., Lin, Y. H., Surratt, J. D., and Weber, R. J.: Sources, Composition and Absorption Angstrom

966 Exponent of Light-absorbing Organic Components in Aerosol Extracts from the Los Angeles Basin,

967 *Environmental Science & Technology*, 47, 3685-3693, <https://10.1021/es305047b>, 2013.

968 Zhang, Y., Ma, Y., and Gong, W.: Retrieval of Brown Carbon based on the aerosol complex refractive

969 indices in the winter of Wuhan, *Geo-spatial Information Science*, 20, 319-324,

970 <https://10.1080/10095020.2017.1394660>, 2017.

971

972
